# Supplementary material for: Direct phosphorylation of benzylic C–H bonds under transition metal-free conditions forming sp3C–P bonds
Source: Royal Society of Chemistry journal article supplement (doi:10.1039/d2ra02812c), 2022-01-01

## *Electronic Supplementary Information*

### **Direct Phosphorylation of Benzylic C-H Bonds under Transition Metal-Free Conditions Forming $sp^3$ C-P Bonds**

Qiang Li,\*<sup>1</sup> Changqiu Zhao,<sup>1</sup> Tieqiao Chen\*<sup>2</sup> and Li-Biao Han\*<sup>2,3</sup>

<sup>1</sup> College of Chemistry and Chemical Engineering, Liaocheng University, No.1, Hunan Road, Liaocheng, Shandong, 252059, China.

<sup>2</sup> Key Laboratory of Ministry of Education for Advanced Materials in Tropical Island Resources, Hainan Provincial Key Lab of Fine Chem, Hainan Provincial Fine Chemical Engineering Research Center, Hainan University, Haikou, 570228, China.

<sup>3</sup> Zhejiang Yanfan New Materials Co., Ltd., Shangyu, Zhejiang Province, 312369, China.

E-mail: tiamochem@hotmail.com; chentieqiao@hnu.edu.cn; hlb@shoufuchem.com

## General Information

Chemicals were purchased and used as received unless otherwise noted. All reactions were carried out in a sealed Schlenk tubes and monitored by GC and/or GC-MS.  $^1\text{H}$  and  $^{13}\text{C}$  NMR spectra were recorded on a Bruker Avance-III 400 instrument (400 MHz for  $^1\text{H}$ , 100 MHz for  $^{13}\text{C}$ , and 162 MHz for  $^{31}\text{P}$  NMR spectroscopy).  $\text{CDCl}_3$  was used as the solvent. Chemical shifts for  $^1\text{H}$  NMR are referred to internal  $\text{Me}_4\text{Si}$  (0 ppm) and reported as follows: chemical shift ( $\delta$  ppm), multiplicity, coupling constant (Hz) and integration. Data for  $^{31}\text{P}$  NMR were relative to  $\text{H}_3\text{PO}_4$  (85% solution in  $\text{D}_2\text{O}$ , 0 ppm). Mass spectra were recorded by GCMS-QP2010 ultra spectrometer. The high-resolution mass spectrum (HRMS) was recorded on MAT 95 XP instrument. The GC yields were determined using dodecane as an internal standard on Shimadzu GC-2014 FID system.

## Typical procedure for the direct phosphorylation of benzylic C-H bonds

A mixture of toluene **1a** (0.8 mL),  $\text{K}_2\text{S}_2\text{O}_8$  (162 mg, 0.6 mmol), and diphenylphosphine oxide **2a** (40.4 mg, 0.2 mmol), SDBS (35.0 g, 0.1 mmol),  $\text{H}_2\text{O}$  (1.6 mL) was stirred at 120 °C under  $\text{N}_2$  in a sealed 25 mL glass tube for 15 min. Then the mixture was extracted with EtOAc. The organic layer was dried over  $\text{Na}_2\text{SO}_4$ , and concentrated under a reduced pressure. The residue was purified by column chromatography on silica gel with EtOAc/petroleum (from 4:1 to 1:1) to afford benzyldiphenylphosphine oxide **3a** in 48% yield.

## Characterization and analytical data of products

*Benzyldiphenylphosphine oxide (3a)*:<sup>1</sup> White solid (28.1 mg, 48%).  $^1\text{H}$  NMR (400 MHz,  $\text{CDCl}_3$ ):  $\delta$  7.71-7.67 (m, 4H), 7.53-7.49 (m, 2H), 7.46-7.41 (m, 4H), 7.19-7.17 (m, 3H), 7.11-7.09 (m, 2H), 3.66 (d,  $J = 13.6$  Hz, 2H).  $^{13}\text{C}$  NMR (100 MHz,  $\text{CDCl}_3$ ):  $\delta$  132.1 (d,  $J = 98.4$  Hz), 131.8 (d,  $J = 2.5$  Hz), 131.2 (d,  $J = 8.9$  Hz), 131.1 (d,  $J = 8.1$  Hz), 130.1 (d,  $J = 5.0$  Hz), 128.5 (d,  $J = 11.5$  Hz), 128.4 (d,  $J = 2.3$  Hz), 126.8 (d,  $J = 2.6$  Hz), 38.1 (d,  $J = 66.2$  Hz).  $^{31}\text{P}$  NMR (162 MHz,  $\text{CDCl}_3$ ):  $\delta$  29.8.

*(4-Methylbenzyl)diphenylphosphine oxide (3b)*:<sup>2</sup> White solid (30.6 mg, 50%).  $^1\text{H}$  NMR (400 MHz,  $\text{CDCl}_3$ ):  $\delta$  7.72-7.67 (m, 4H), 7.53-7.49 (m, 2H), 7.46-7.42 (m, 4H), 6.99 (s, 4H), 3.63 (d,  $J = 13.6$  Hz, 2H), 2.26 (s, 3H).  $^{13}\text{C}$  NMR (100 MHz,  $\text{CDCl}_3$ ):  $\delta$  136.4 (d,  $J = 3.0$  Hz), 132.2 (d,  $J = 94.8$  Hz), 131.8 (d,  $J = 2.5$  Hz),

131.2 (d,  $J = 9.0$  Hz), 130.0 (d,  $J = 5.1$  Hz), 129.1 (d,  $J = 2.3$  Hz), 128.5 (d,  $J = 11.5$  Hz), 127.8 (d,  $J = 8.0$  Hz), 37.6 (d,  $J = 66.2$  Hz), 21.0.  $^{31}\text{P}$  NMR (162 MHz,  $\text{CDCl}_3$ ):  $\delta$  29.9.

(3-Methylbenzyl)diphenylphosphine oxide (**3c**):<sup>3</sup> White solid (26.9 mg, 44%).  $^1\text{H}$  NMR (400 MHz,  $\text{CDCl}_3$ ):  $\delta$  7.72-7.67 (m, 4H), 7.53-7.50 (m, 2H), 7.46-7.42 (m, 4H), 7.06 (t,  $J = 7.6$  Hz, 1H), 6.98 (d,  $J = 8.0$  Hz, 1H), 6.92 (s, 1H), 6.86 (d,  $J = 7.6$  Hz, 1H), 3.62 (d,  $J = 13.6$  Hz, 2H), 2.22 (s, 3H).  $^{13}\text{C}$  NMR (100 MHz,  $\text{CDCl}_3$ ):  $\delta$  137.9 (d,  $J = 2.3$  Hz), 132.3 (d,  $J = 97.1$  Hz), 131.8 (d,  $J = 2.5$  Hz), 131.2 (d,  $J = 8.8$  Hz), 131.0 (d,  $J = 4.8$  Hz), 130.9 (d,  $J = 7.8$  Hz), 128.4 (d,  $J = 11.4$  Hz), 128.2 (d,  $J = 2.2$  Hz), 127.6 (d,  $J = 2.7$  Hz), 127.1 (d,  $J = 5.0$  Hz), 38.0 (d,  $J = 66.0$  Hz), 21.3.  $^{31}\text{P}$  NMR (162 MHz,  $\text{CDCl}_3$ ):  $\delta$  29.8.

(2-Methylbenzyl)diphenylphosphine oxide (**3d**):<sup>1</sup> White solid (31.9 mg, 52%).  $^1\text{H}$  NMR (400 MHz,  $\text{CDCl}_3$ ):  $\delta$  7.67 (dd,  $J = 11.2$  Hz, 7.6 Hz, 4H), 7.55-7.51 (m, 2H), 7.46-7.42 (m, 4H), 7.12-7.07 (m, 2H), 7.01-6.94 (m, 2H), 3.68 (d,  $J = 14.0$  Hz, 2H), 2.14 (s, 3H).  $^{13}\text{C}$  NMR (100 MHz,  $\text{CDCl}_3$ ):  $\delta$  137.5 (d,  $J = 5.2$  Hz), 132.4 (d,  $J = 94.4$  Hz), 131.9 (d,  $J = 2.0$  Hz), 131.3 (d,  $J = 8.9$  Hz), 130.7 (d,  $J = 4.3$  Hz), 130.5 (d,  $J = 2.3$  Hz), 129.6 (d,  $J = 7.8$  Hz), 128.5 (d,  $J = 11.4$  Hz), 127.0 (d,  $J = 2.9$  Hz), 125.8 (d,  $J = 2.5$  Hz), 35.3 (d,  $J = 67.1$  Hz), 20.1.  $^{31}\text{P}$  NMR (162 MHz,  $\text{CDCl}_3$ ):  $\delta$  30.0.

(3,5-Dimethylbenzyl)diphenylphosphine oxide (**3e**): White solid (32.0 mg, 50%).  $^1\text{H}$  NMR (400 MHz,  $\text{CDCl}_3$ ):  $\delta$  7.70 (dd,  $J = 11.2$  Hz, 7.6 Hz, 4H), 7.53-7.50 (m, 2H), 7.47-7.42 (m, 4H), 6.80 (s, 1H), 6.68 (s, 2H), 3.58 (d,  $J = 13.6$  Hz, 2H), 2.17 (s, 6H).  $^{13}\text{C}$  NMR (100 MHz,  $\text{CDCl}_3$ ):  $\delta$  137.7 (d,  $J = 2.4$  Hz), 132.2 (d,  $J = 100.0$  Hz), 131.7 (d,  $J = 2.6$  Hz), 131.2 (d,  $J = 8.9$  Hz), 130.6 (d,  $J = 7.9$  Hz), 128.4, 128.4 (d,  $J = 11.7$  Hz), 128.0 (d,  $J = 5.1$  Hz), 37.9 (d,  $J = 66.3$  Hz), 21.1.  $^{31}\text{P}$  NMR (162 MHz,  $\text{CDCl}_3$ ):  $\delta$  30.0. MS (EI):  $m/z$  (%) 321 (8), 320 (35), 319 (28), 202 (14), 201 (100), 195 (9), 119 (8), 91 (6), 77 (17), 51 (5). HRMS Calcd for  $\text{C}_{21}\text{H}_{21}\text{OP}$ : 320.1330; found: 320.1315.

Diphenyl(2,4,5-trimethylbenzyl)phosphine oxide (**3f**): White solid (28.1 mg, 42%).  $^1\text{H}$  NMR (400 MHz,  $\text{CDCl}_3$ ):  $\delta$  7.70-7.65 (m, 4H), 7.54-7.51 (m, 2H), 7.46-7.42 (m, 4H), 6.86 (s, 1H), 6.69 (s, 1H), 3.60 (d,  $J = 13.6$  Hz, 2H), 2.16 (s, 3H), 2.04 (s, 3H), 2.02 (s, 3H).  $^{13}\text{C}$  NMR (100 MHz,  $\text{CDCl}_3$ ):  $\delta$  135.1 (d,  $J = 5.1$  Hz), 134.4 (d,  $J = 5.6$  Hz), 133.7 (d,  $J = 2.7$  Hz), 133.1 (d,  $J = 2.0$  Hz), 132.6 (d,  $J = 99.6$  Hz), 132.0 (d,  $J = 4.3$  Hz), 131.7 (b), 131.3 (d,  $J = 9.1$  Hz), 128.4 (d,  $J = 11.5$  Hz), 127.3 (d,  $J = 10.0$  Hz), 126.4 (d,  $J = 8.3$  Hz), 34.8 (d,  $J = 66.6$  Hz), 19.3, 19.2, 19.0.  $^{31}\text{P}$  NMR (162 MHz,  $\text{CDCl}_3$ ):  $\delta$  29.6. MS (EI):  $m/z$  (%) 335 (24), 334 (100), 319 (12), 243 (12), 209 (46), 201 (76), 193 (16), 133 (93), 132 (14), 117 (24), 91 (16), 77 (20). HRMS Calcd for  $\text{C}_{22}\text{H}_{23}\text{OP}$ : 334.1487; found: 334.1480.

(4-Methoxybenzyl)diphenylphosphine oxide (**3g**):<sup>1</sup> White solid (16.1 mg, 25%).  $^1\text{H}$  NMR (400 MHz,  $\text{CDCl}_3$ ):  $\delta$  7.71-7.67 (m, 4H), 7.53-7.50 (m, 2H), 7.46-7.42 (m, 4H), 7.02 (d,  $J = 8.0$  Hz, 2H), 6.73 (d,  $J = 8.0$  Hz, 2H), 3.74 (s, 3H), 3.61 (d,  $J = 13.6$  Hz, 2H).  $^{13}\text{C}$  NMR (100 MHz,  $\text{CDCl}_3$ ):  $\delta$  158.5 (d,  $J = 2.7$  Hz), 132.3

(d,  $J = 98.3$  Hz), 131.7 (d,  $J = 2.7$  Hz), 131.2 (d,  $J = 9.0$  Hz), 131.1 (d,  $J = 5.0$  Hz), 128.5 (d,  $J = 11.5$  Hz), 122.9 (d,  $J = 8.0$  Hz), 113.9 (d,  $J = 2.5$  Hz), 55.2, 37.1 (d,  $J = 66.9$  Hz).  $^{31}\text{P}$  NMR (162 MHz,  $\text{CDCl}_3$ ):  $\delta$  30.1.

(3-Methoxybenzyl)diphenylphosphine oxide (**3h**): White solid (13.5 mg, 21%).  $^1\text{H}$  NMR (400 MHz,  $\text{CDCl}_3$ ):  $\delta$  7.70 (dd,  $J = 11.6$  Hz, 7.6 Hz, 4H), 7.53-7.50 (m, 2H), 7.46-7.42 (m, 4H), 7.09 (t,  $J = 7.6$  Hz, 1H), 6.70 (dd,  $J = 10.8$ , 10.8 Hz, 2 H), 6.63 (s, 1H), 3.65 (s, 3H), 3.64 (d,  $J = 14.0$  Hz, 2H).  $^{13}\text{C}$  NMR (100 MHz,  $\text{CDCl}_3$ ):  $\delta$  159.4 (d,  $J = 2.6$  Hz), 132.6 (d,  $J = 7.9$  Hz), 132.3 (d,  $J = 98.4$  Hz), 131.8 (d,  $J = 2.8$  Hz), 131.2 (d,  $J = 9.1$  Hz), 129.3 (d,  $J = 2.5$  Hz), 128.5 (d,  $J = 11.6$  Hz), 122.6 (d,  $J = 5.4$  Hz), 115.2 (d,  $J = 5.1$  Hz), 113.0 (d,  $J = 2.9$  Hz), 55.1, 38.2 (d,  $J = 66.0$  Hz).  $^{31}\text{P}$  NMR (162 MHz,  $\text{CDCl}_3$ ):  $\delta$  29.6. MS (EI):  $m/z$  (%) 323 (5), 322 (28), 321 (46), 202 (13), 201 (100), 77 (15), 51 (6). HRMS Calcd for  $\text{C}_{20}\text{H}_{18}\text{O}_2\text{P}$ : 322.1123; found: 321.1040 [M-H].

(4-Fluorobenzyl)diphenylphosphine oxide (**3i**):<sup>1</sup> White solid (25.4 mg, 41%).  $^1\text{H}$  NMR (400 MHz,  $\text{CDCl}_3$ ):  $\delta$  7.71-7.66 (m, 4H), 7.54-7.51 (m, 2H), 7.47-7.43 (m, 4H), 7.09-7.05 (m, 2H), 6.88 (t,  $J = 8.4$  Hz, 2H), 3.62 (d,  $J = 13.2$  Hz, 2H).  $^{13}\text{C}$  NMR (100 MHz,  $\text{CDCl}_3$ ):  $\delta$  161.9 (dd,  $J = 243.8$ , 3.3 Hz), 132.0 (d,  $J = 99.5$  Hz), 131.9 (d,  $J = 2.7$  Hz), 131.6 (dd,  $J = 7.8$ , 5.3 Hz), 131.1 (d,  $J = 9.1$  Hz), 128.5 (d,  $J = 11.6$  Hz), 126.8 (dd,  $J = 7.8$ , 3.3 Hz), 115.3 (dd,  $J = 21.4$ , 2.5 Hz), 37.2 (d,  $J = 66.4$  Hz).  $^{31}\text{P}$  NMR (162 MHz,  $\text{CDCl}_3$ ):  $\delta$  29.8.

(4-Chlorobenzyl)diphenylphosphine oxide (**3j**):<sup>2</sup> White solid (24.1 mg, 37%).  $^1\text{H}$  NMR (400 MHz,  $\text{CDCl}_3$ ):  $\delta$  7.71-7.66 (m, 4H), 7.54-7.51 (m, 2H), 7.47-7.43 (m, 4H), 7.16 (d,  $J = 8.0$  Hz, 2H), 7.04 (d,  $J = 8.0$  Hz, 2H), 3.62 (d,  $J = 13.2$  Hz, 2H).  $^{13}\text{C}$  NMR (100 MHz,  $\text{CDCl}_3$ ):  $\delta$  132.9 (d,  $J = 3.5$  Hz), 132.0 (d,  $J = 2.8$  Hz), 131.8 (d,  $J = 111.1$  Hz), 131.4 (d,  $J = 5.1$  Hz), 131.1 (d,  $J = 9.1$  Hz), 129.6 (d,  $J = 8.1$  Hz), 128.6 (d,  $J = 14.2$  Hz), 128.5, 37.4 (d,  $J = 66.6$  Hz).  $^{31}\text{P}$  NMR (162 MHz,  $\text{CDCl}_3$ ):  $\delta$  29.5.

(4-Bromobenzyl)diphenylphosphine oxide (**3k**):<sup>2</sup> White solid (25.9 mg, 35%).  $^1\text{H}$  NMR (400 MHz,  $\text{CDCl}_3$ ):  $\delta$  7.71-7.66 (m, 4H), 7.54-7.51 (m, 2H), 7.47-7.43 (m, 4H), 7.30 (d,  $J = 8.0$  Hz, 2H), 6.98 (d,  $J = 8.0$  Hz, 2H), 3.59 (d,  $J = 13.6$  Hz, 2H).  $^{13}\text{C}$  NMR (100 MHz,  $\text{CDCl}_3$ ):  $\delta$  131.9 (d,  $J = 2.7$  Hz), 131.9 (d,  $J = 98.7$  Hz), 131.7 (d,  $J = 5.2$  Hz), 131.4 (d,  $J = 2.5$  Hz), 131.1 (d,  $J = 9.0$  Hz), 130.2 (d,  $J = 7.7$  Hz), 128.6 (d,  $J = 11.7$  Hz), 120.9 (d,  $J = 3.7$  Hz), 37.5 (d,  $J = 65.6$  Hz).  $^{31}\text{P}$  NMR (162 MHz,  $\text{CDCl}_3$ ):  $\delta$  29.1.

Diphenyl(1-phenylethyl)phosphine oxide (**3l**):<sup>4</sup> White solid (18.4 mg, 30%).  $^1\text{H}$  NMR (400 MHz,  $\text{CDCl}_3$ ):  $\delta$  7.92-7.88 (m, 2H), 7.58-7.50 (m, 3H), 7.47-7.42 (m, 2H), 7.37-7.34 (m, 1H), 7.28-7.14 (m, 7H), 3.65-3.57 (m, 1H), 1.58 (dd,  $J = 16.0$ , 7.2 Hz, 3H).  $^{13}\text{C}$  NMR (100 MHz,  $\text{CDCl}_3$ ):  $\delta$  137.9 (d,  $J = 5.5$  Hz), 131.9 (d,  $J = 97.9$  Hz), 131.8 (d,  $J = 97.9$  Hz), 131.7 (d,  $J = 2.7$  Hz), 131.4 (d,  $J = 8.4$  Hz), 131.3 (d,  $J = 2.6$  Hz), 131.1 (d,  $J = 9.6$  Hz), 129.2 (d,  $J = 5.5$  Hz), 128.7 (d,  $J = 11.1$  Hz), 128.2 (d,  $J = 1.9$  Hz), 128.1 (d,  $J = 11.5$  Hz), 126.9 (d,  $J = 2.6$  Hz), 41.0 (d,  $J = 66.6$  Hz), 15.4 (d,  $J = 2.7$  Hz).  $^{31}\text{P}$  NMR (162 MHz,  $\text{CDCl}_3$ ):  $\delta$  33.8.

(2-Methyl-1-phenylpropyl)diphenylphosphine oxide (**3m**): White solid (18.1 mg, 27%). <sup>1</sup>H NMR (400 MHz, CDCl<sub>3</sub>): δ 7.98-7.93 (m, 2H), 7.53-7.46 (m, 5H), 7.38 (d, *J* = 7.6 Hz, 2H), 7.25-7.10 (m, 6H), 3.34 (dd, *J* = 8.0, 5.6 Hz, 1H), 2.54-2.43 (m, 1H), 1.00 (d, *J* = 6.8 Hz, 3H), 0.87 (d, *J* = 6.8 Hz, 3H). <sup>13</sup>C NMR (100 MHz, CDCl<sub>3</sub>): δ 135.1 (d, *J* = 3.7 Hz), 133.9 (d, *J* = 92.8 Hz), 133.6 (d, *J* = 92.8 Hz), 131.4 (d, *J* = 2.5 Hz), 131.0 (d, *J* = 2.7 Hz), 130.9 (b), 130.7 (d, *J* = 8.3 Hz), 130.7 (b), 128.7 (d, *J* = 11.0 Hz), 127.9 (b), 127.9 (d, *J* = 13.0 Hz), 126.7 (d, *J* = 1.6 Hz), 52.4 (d, *J* = 68.0 Hz), 29.4, 23.4 (d, *J* = 10.0 Hz), 20.6 (d, *J* = 5.3 Hz). <sup>31</sup>P NMR (162 MHz, CDCl<sub>3</sub>): δ 31.8. MS (EI): *m/z* (%) 334 (12), 293 (8), 292 (36), 291 (9), 216 (30), 203 (20), 202 (100), 201 (89), 183 (8), 165 (8), 125 (8), 91 (46), 77 (20), 55 (7). HRMS Calcd for C<sub>22</sub>H<sub>23</sub>OP: 334.1487; found: 334.1481.

(Naphthalen-1-ylmethyl)diphenylphosphine oxide (**3p**):<sup>1</sup> White solid (13.7 mg, 20%). <sup>1</sup>H NMR (400 MHz, CDCl<sub>3</sub>): δ 7.92 (d, *J* = 8.0 Hz, 1H), 7.78 (d, *J* = 7.6 Hz, 1H), 7.71-7.67 (m, 5H), 7.50-7.46 (m, 2H), 7.42-7.35 (m, 6H), 7.29-7.23 (m, 2H), 4.13 (d, *J* = 14.0 Hz, 2H). <sup>13</sup>C NMR (100 MHz, CDCl<sub>3</sub>): δ 133.8 (d, *J* = 1.9 Hz), 132.5 (d, *J* = 4.4 Hz), 132.3 (d, *J* = 101.4 Hz), 131.8 (d, *J* = 2.9 Hz), 131.2 (d, *J* = 9.1 Hz), 128.7 (d, *J* = 6.2 Hz), 128.5 (d, *J* = 2.9 Hz), 128.5 (d, *J* = 11.6 Hz), 127.7 (d, *J* = 8.4 Hz), 127.7 (d, *J* = 3.3 Hz), 125.9, 125.6, 125.1 (d, *J* = 3.3 Hz), 124.3, 34.9 (d, *J* = 66.4 Hz). <sup>31</sup>P NMR (162 MHz, CDCl<sub>3</sub>): δ 29.7.

(Naphthalen-2-ylmethyl)diphenylphosphine oxide (**3q**):<sup>4</sup> White solid (19.9 mg, 29%). <sup>1</sup>H NMR (400 MHz, CDCl<sub>3</sub>): δ 7.75-7.69 (m, 5H), 7.66 (d, *J* = 7.6 Hz, 2H), 7.57 (s, 1H), 7.52-7.48 (m, 2H), 7.44-7.39 (m, 6H), 7.25-7.22 (m, 1H), 3.81 (d, *J* = 14.0 Hz, 2H). <sup>13</sup>C NMR (100 MHz, CDCl<sub>3</sub>): δ 133.3 (d, *J* = 2.1 Hz), 132.3 (d, *J* = 94.3 Hz), 132.2 (d, *J* = 1.4 Hz), 131.9 (d, *J* = 2.3 Hz), 131.2 (d, *J* = 9.0 Hz), 129.0 (d, *J* = 6.6 Hz), 128.8 (d, *J* = 8.1 Hz), 128.6 (d, *J* = 11.5 Hz), 128.2 (d, *J* = 4.0 Hz), 128.0 (d, *J* = 1.7 Hz), 127.6, 127.6, 126.0, 125.7, 38.4 (d, *J* = 65.9 Hz). <sup>31</sup>P NMR (162 MHz, CDCl<sub>3</sub>): δ 29.6.

Diphenyl(quinolin-2-ylmethyl)phosphine oxide (**3r**):<sup>6</sup> White solid (33.7 mg, 49%). <sup>1</sup>H NMR (400 MHz, CDCl<sub>3</sub>): δ 8.03 (d, *J* = 8.4 Hz, 1H), 7.91 (d, *J* = 8.4 Hz, 1H), 7.80 (dd, *J* = 12.0, 7.6 Hz, 4H), 7.74 (d, *J* = 8.0 Hz, 1H), 7.66-7.60 (m, 2H), 7.49-7.45 (m, 3H), 7.43-7.38 (m, 4H), 4.2 (d, *J* = 14.4 Hz, 2H). <sup>13</sup>C NMR (100 MHz, CDCl<sub>3</sub>): δ 153.2 (d, *J* = 6.8 Hz), 147.6, 136.5, 132.2 (d, *J* = 100.9 Hz), 131.8 (d, *J* = 2.9 Hz), 131.1 (d, *J* = 9.5 Hz), 129.5, 128.5, 128.4 (d, *J* = 11.8 Hz), 127.5, 126.8 (d, *J* = 1.5 Hz), 126.2, 122.7 (d, *J* = 2.5 Hz), 41.7 (d, *J* = 63.1 Hz). <sup>31</sup>P NMR (162 MHz, CDCl<sub>3</sub>): δ 30.1.

Benzyl-di-*p*-tolylphosphine oxide (**3s**):<sup>7</sup> White solid (26.3 mg, 41%). <sup>1</sup>H NMR (400 MHz, CDCl<sub>3</sub>): δ 7.56 (dd, *J* = 11.2 Hz, 7.6 Hz, 4H), 7.23 (d, *J* = 7.2 Hz, 4H), 7.19-7.17 (m, 3H), 7.11 (d, *J* = 6.0 Hz, 2H), 3.62 (d, *J* = 13.6 Hz, 2H), 2.38 (s, 3H). <sup>13</sup>C NMR (100 MHz, CDCl<sub>3</sub>): δ 142.1 (d, *J* = 2.8 Hz), 131.4 (d, *J* = 7.8 Hz), 131.1 (d, *J* = 9.4 Hz), 130.1 (d, *J* = 5.2 Hz), 129.1 (d, *J* = 12.0 Hz), 129.1 (d, *J* = 100.9 Hz), 128.3 (d, *J* = 2.5 Hz), 126.6 (d, *J* = 2.9 Hz), 38.2 (d, *J* = 66.3 Hz), 21.5. <sup>31</sup>P NMR (162 MHz, CDCl<sub>3</sub>): δ 30.2.

*Benzylbis(4-fluorophenyl)phosphine oxide (3t)*: White solid (29.5 mg, 45%). <sup>1</sup>H NMR (400 MHz, CDCl<sub>3</sub>): δ 7.69-7.63 (m, 4H), 7.21-7.20 (m, 3H), 7.16-7.12 (m, 2H), 7.13 (dd, *J* = 8.4, 8.4 Hz, 4H), 7.08 (b, 2H), 3.63 (d, *J* = 13.6 Hz, 2H). <sup>13</sup>C NMR (100 MHz, CDCl<sub>3</sub>): δ 165.0 (dd, *J* = 252.2, 3.1 Hz), 133.6 (dd, *J* = 10.5, 8.7 Hz), 130.7 (d, *J* = 7.9 Hz), 130.1 (d, *J* = 5.2 Hz), 128.5 (d, *J* = 2.5 Hz), 128.0 (dd, *J* = 103.2, 3.4 Hz), 127.0 (d, *J* = 3.0 Hz), 116.0 (dd, *J* = 21.3, 12.7 Hz), 38.4 (d, *J* = 67.1 Hz). <sup>31</sup>P NMR (162 MHz, CDCl<sub>3</sub>): δ 28.6. MS (EI): *m/z* (%) 328 (16), 327 (33), 238 (13), 237 (100), 189 (4), 95 (9), 91 (10), 77 (4), 75 (6), 65 (7). HRMS Calcd for C<sub>19</sub>H<sub>14</sub>F<sub>2</sub>OP: 327.0829; found: 327.0747 [M-H].

*Benzylbis(4-chlorophenyl)phosphine oxide (3u)*:<sup>8</sup> White solid (25.9 mg, 36%). <sup>1</sup>H NMR (400 MHz, CDCl<sub>3</sub>): δ 7.62-7.57 (m, 4H), 7.42 (db, *J* = 7.6 Hz, 4H), 7.27-7.20 (m, 3H), 7.09 (b, 2H), 3.63 (d, *J* = 13.6 Hz, 2H). <sup>13</sup>C NMR (100 MHz, CDCl<sub>3</sub>): δ 138.6 (d, *J* = 3.4 Hz), 132.5 (d, *J* = 9.9 Hz), 130.3 (d, *J* = 99.8 Hz), 130.3 (d, *J* = 8.0 Hz), 130.0 (d, *J* = 5.4 Hz), 129.0 (d, *J* = 12.2 Hz), 128.5 (d, *J* = 2.6 Hz), 127.1 (d, *J* = 2.9 Hz), 38.0 (d, *J* = 66.9 Hz). <sup>31</sup>P NMR (162 MHz, CDCl<sub>3</sub>): δ 28.5.

## References

1. Montel, S.; Jia, T.; Walsh, P. J. *Org. Lett.* **2014**, *16*, 130.
2. Wang, F.; Qu, M.; Chen, F.; Xu, Q.; Shi, M. *Chem. Commun.* **2012**, *48*, 8580.
3. Shutt, J. R.; Trippett, S. *J. Chem. Soc. C.* **1969**, 2038.
4. Chen, Z.-S.; Zhou, Z.-Z.; Hua, H.-L.; Duan, X.-H.; Luo, J.-Y.; Wang, J.; Zhou, P.-X.; Liang, Y.-M. *Tetrahedron* **2013**, *69*, 1065.
5. Yang, J.; Chen, T.; Han, L.-B. *J. Am. Chem. Soc.* **2015**, *137*, 1782.
6. Uffmann, T.; Joussen, R. *Chem. Ber.* **1977**, *110*, 3930.
7. Tsvetkov, E. N.; Shvets, A. A.; Korolev, B. A.; Bondarenko, N. A.; Goncharova, L. V.; Osmolovskaya, L. A. *Zh. Obshch. Khim.* **1992**, *62*, 2223.
8. Jugelt, W.; Lamm, W.; Pragst, F. *J. Prakt. Chem.* **1972**, *314*, 193.

# Copies of <sup>1</sup>H NMR, <sup>13</sup>C NMR and <sup>31</sup>P NMR spectroscopies

## <sup>1</sup>H NMR

20141227-hlb-lq-4.10.fid  
lq-20141227-4

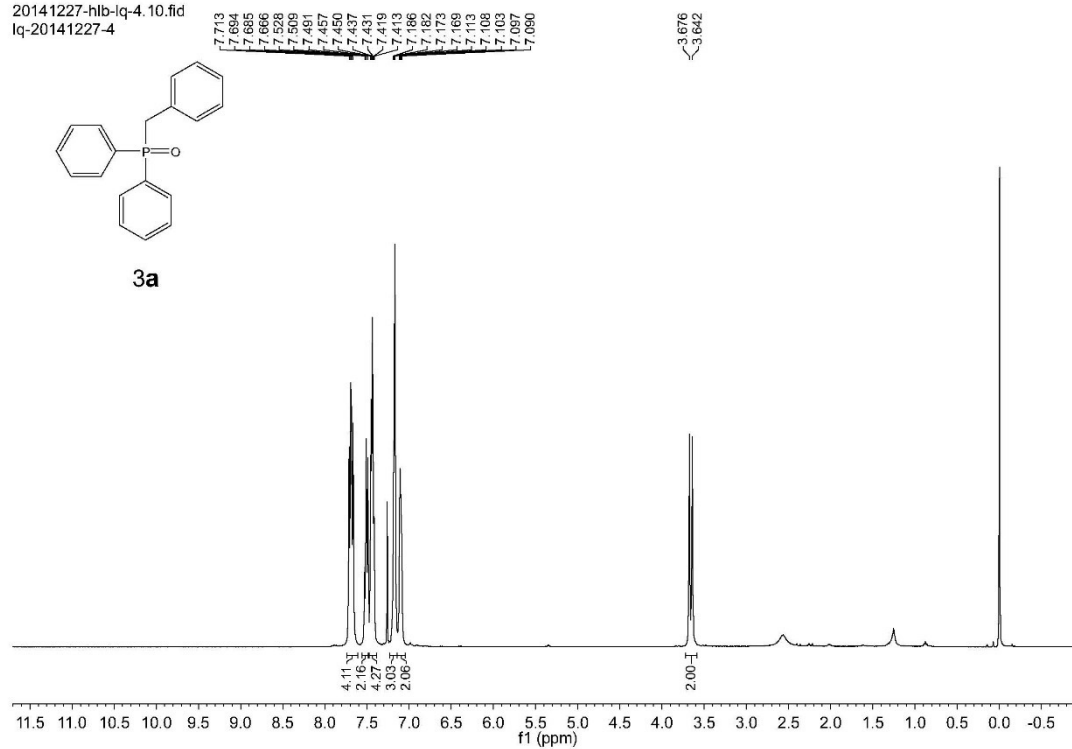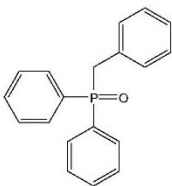

3a

## <sup>13</sup>C NMR

20141227-han-lq-20141227-04.11.fid  
lq-04

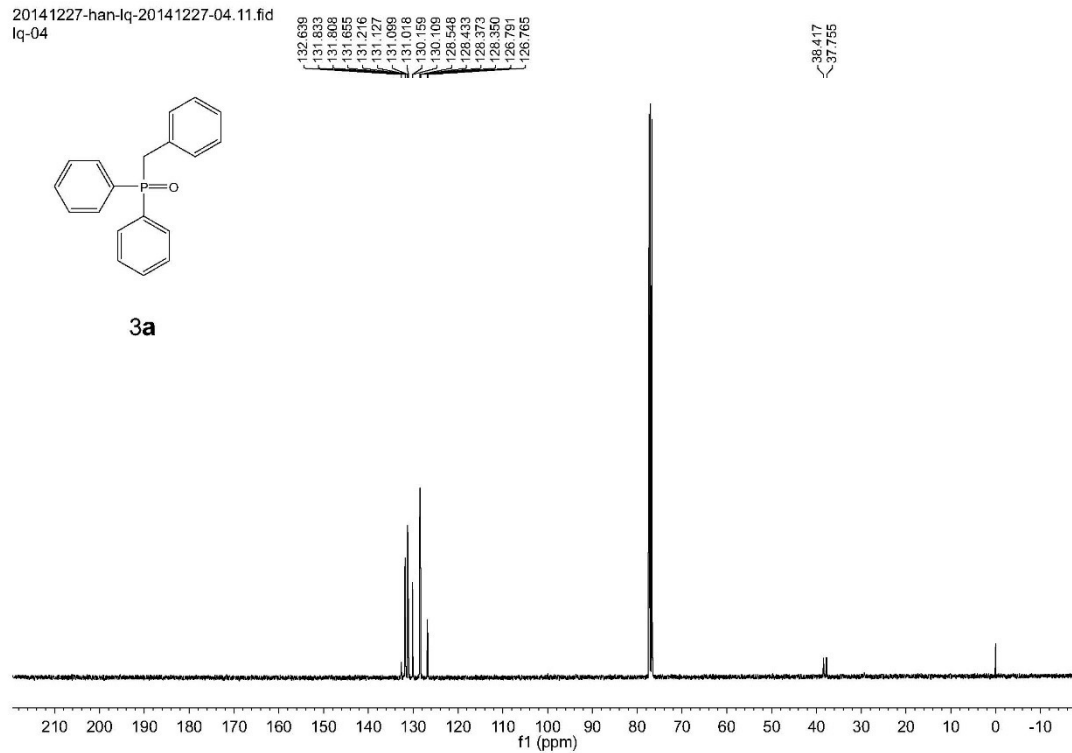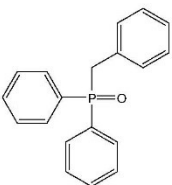

3a



### $^{31}\text{P}$ NMR

20141227-hlb-lq-4.11.fid  
lq-20141227-4

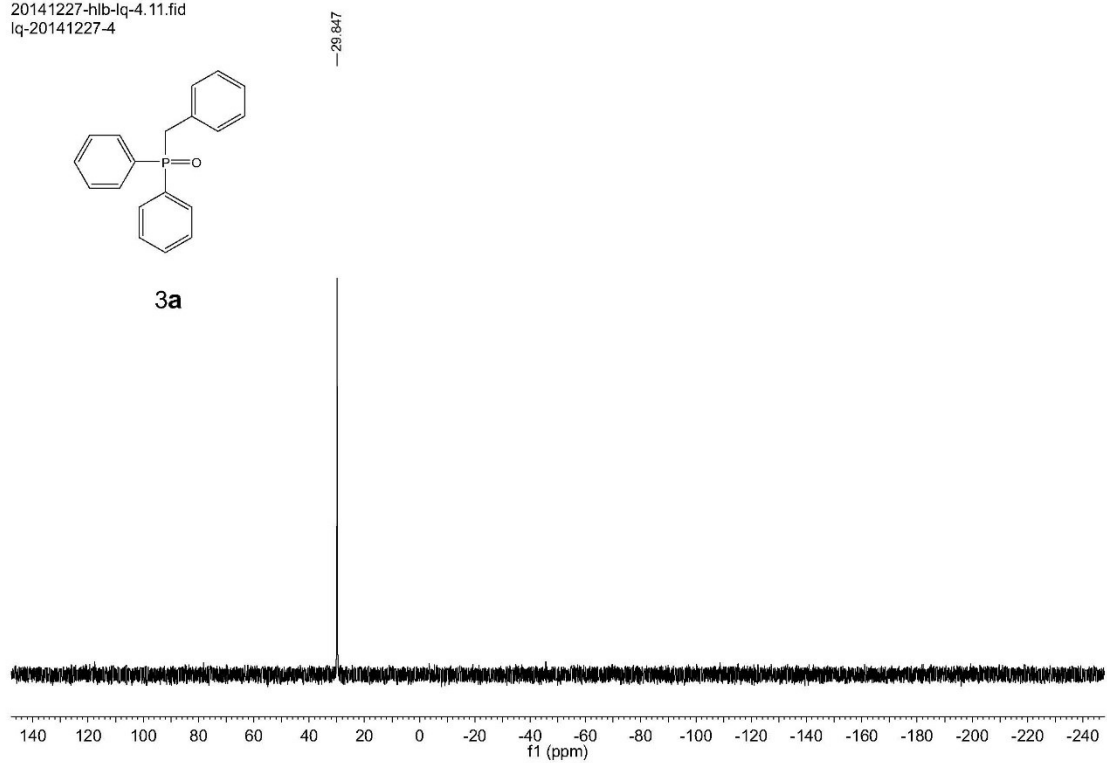

### $^1\text{H}$ NMR

20141227-hlb-lq-3.10.fid  
lq-20141227-3

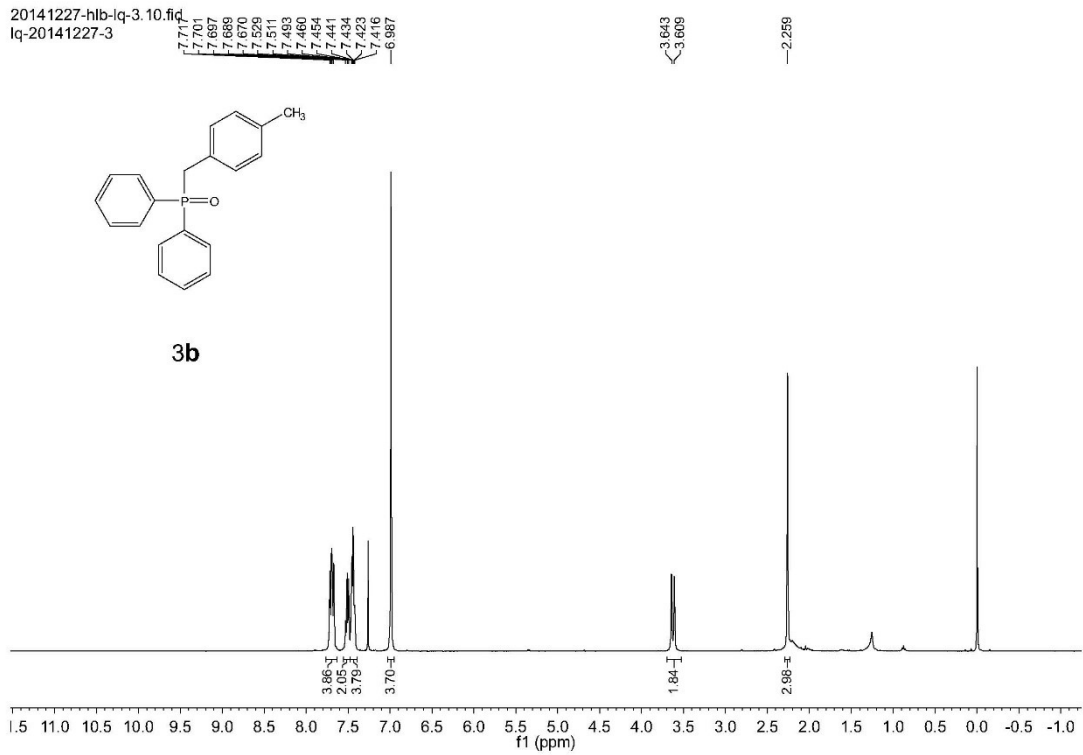

### <sup>13</sup>C NMR

20141227-han-lq-03.20.fid  
lq-20141227-2

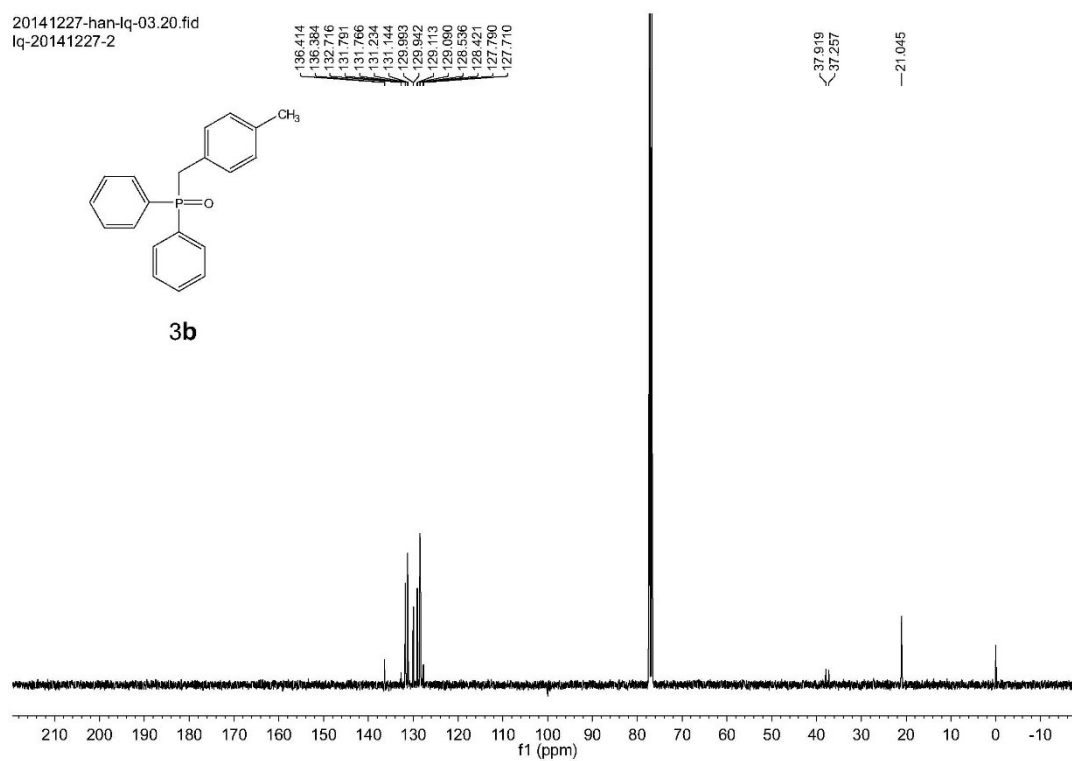

### <sup>31</sup>P NMR

20141227-hlb-lq-3.12.fid  
lq-20141227-3

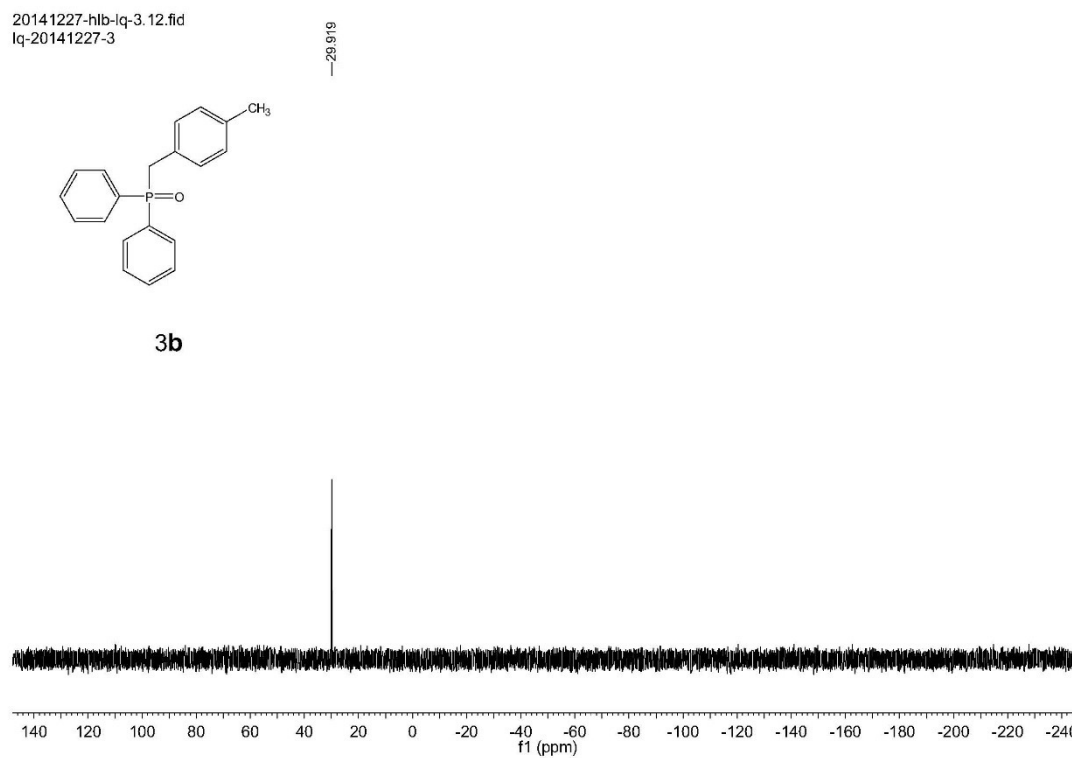

# <sup>1</sup>H NMR

20150131-hlb-lq-02.13.fid  
lq-20150131-02

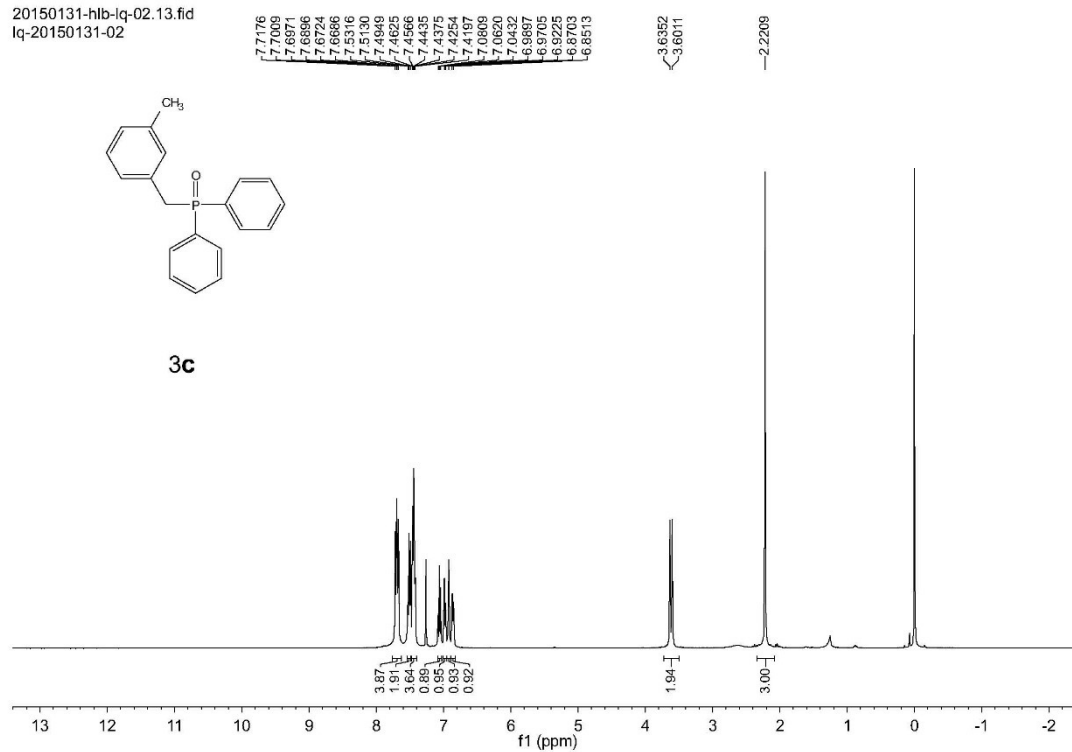

# <sup>13</sup>C NMR

20150131-hlb-lq-02.15.fid  
lq-20150131-02

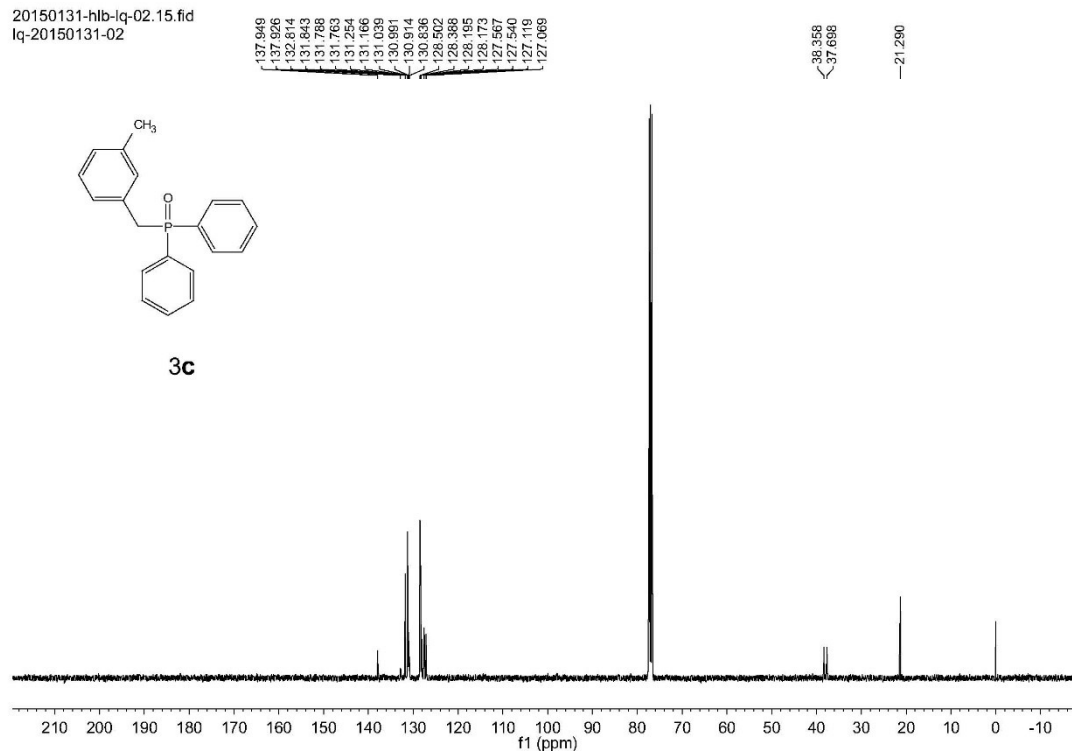

### <sup>31</sup>P NMR

20150131-hlb-lq-02.14.fid  
lq-20150131-02

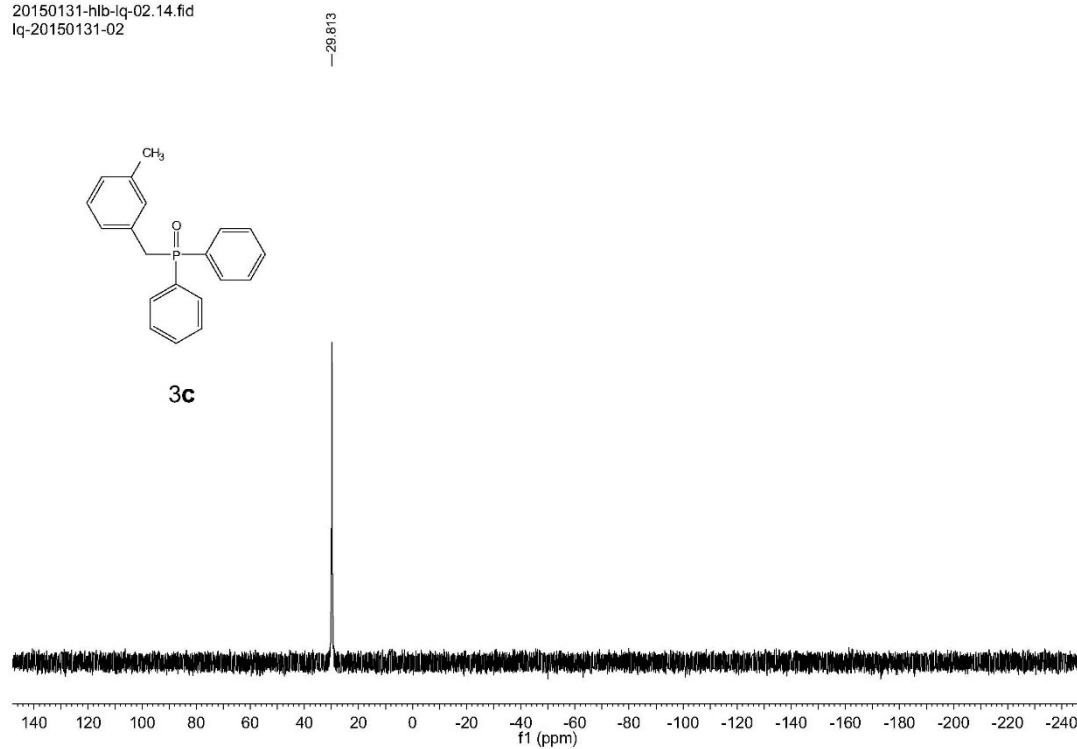

### <sup>1</sup>H NMR

20150429-han-lq-06.10.fid  
lq-20150429-6 2ah

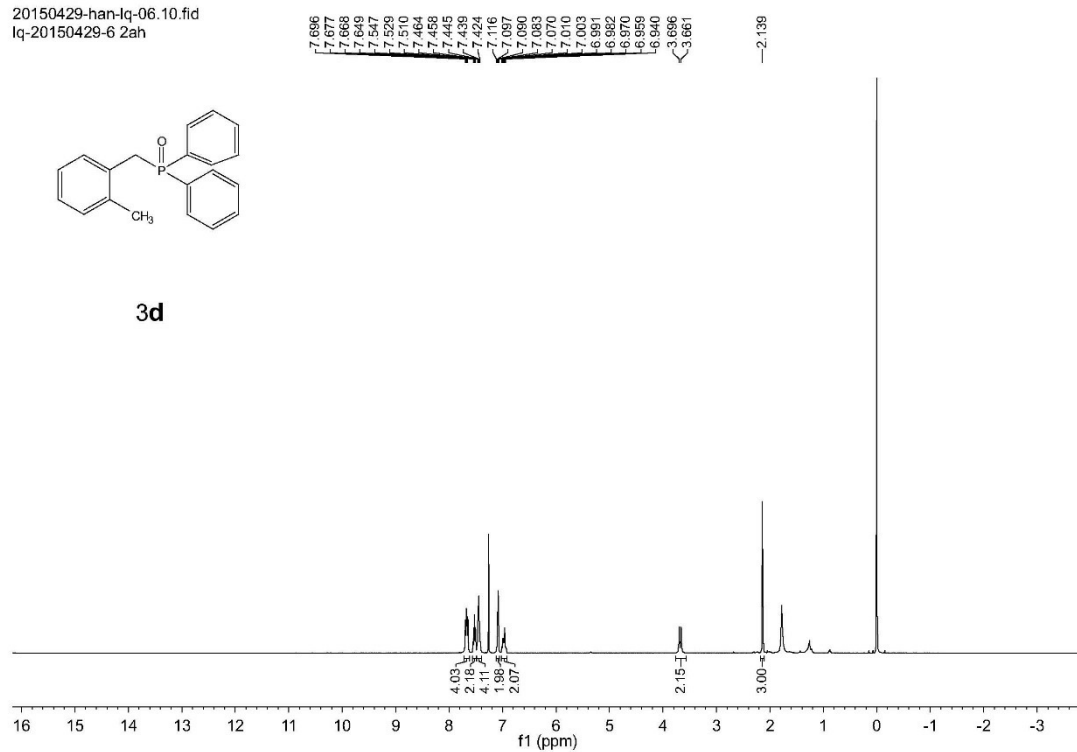

### <sup>13</sup>C NMR

20160104-hlb-lq-07.42.fid  
lq-20150425-6 linjajijiaben 10240

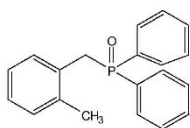

**3d**

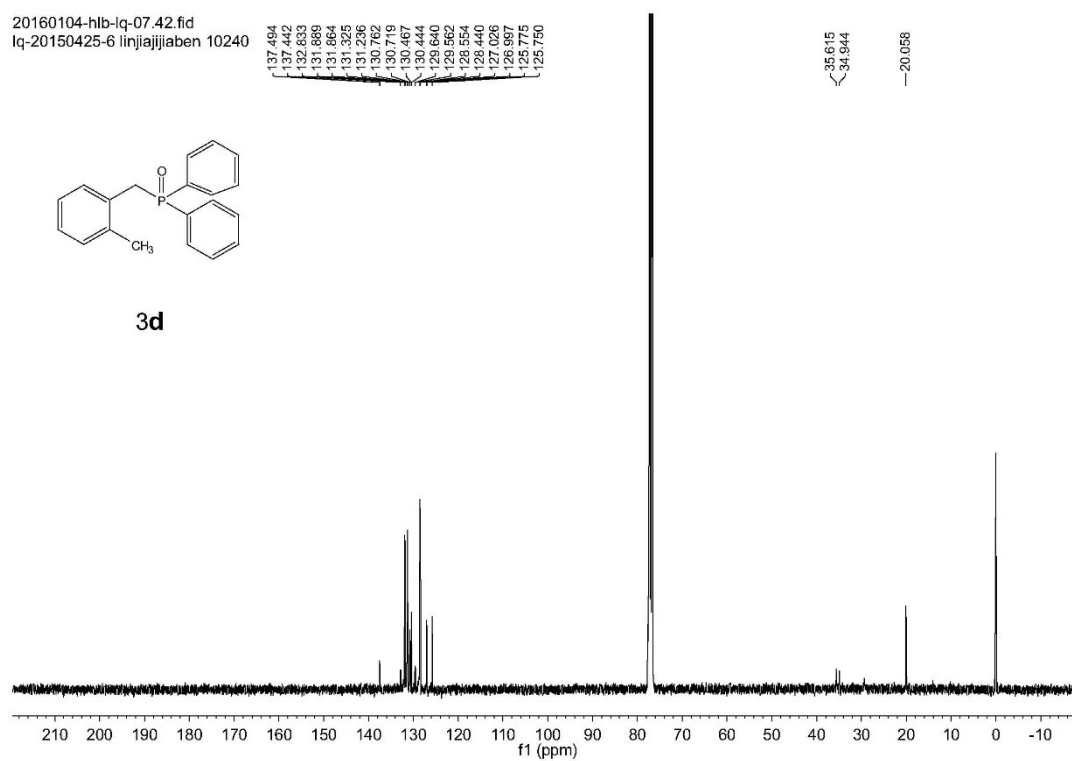

### <sup>31</sup>P NMR

20150429-han-lq-06.11.fid  
lq-20150429-6 2ah

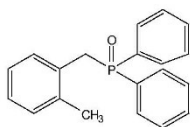

**3d**

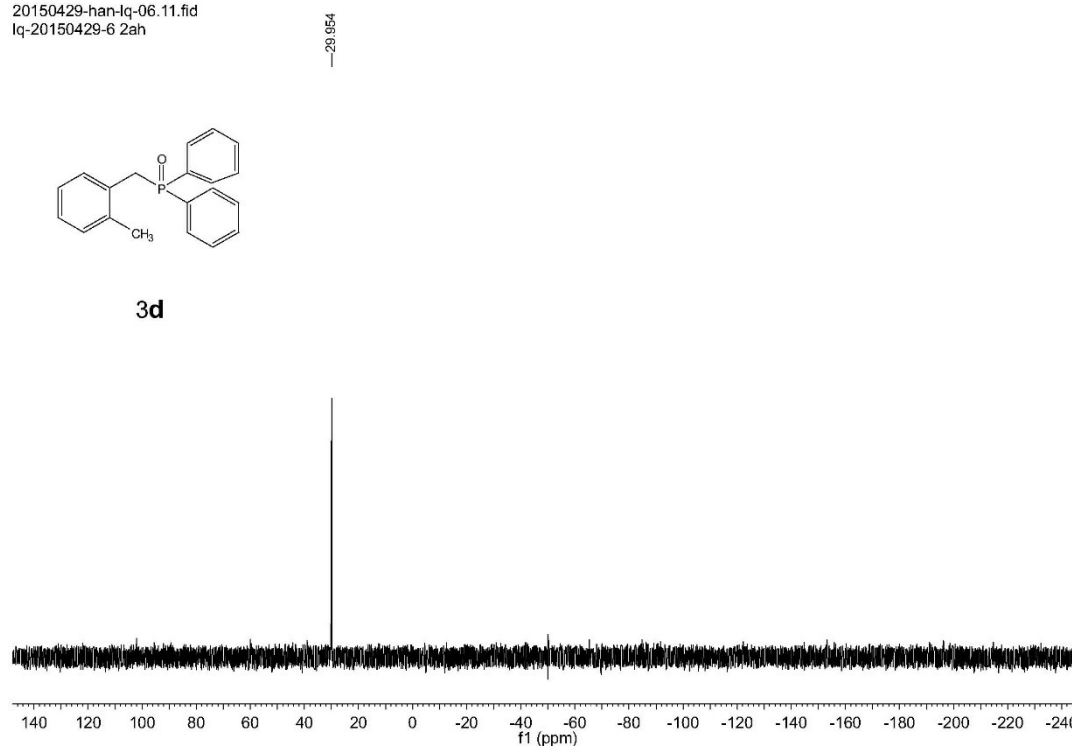

# <sup>1</sup>H NMR

20141227-hlb-lq-2.11.fid  
lq-20141227-2

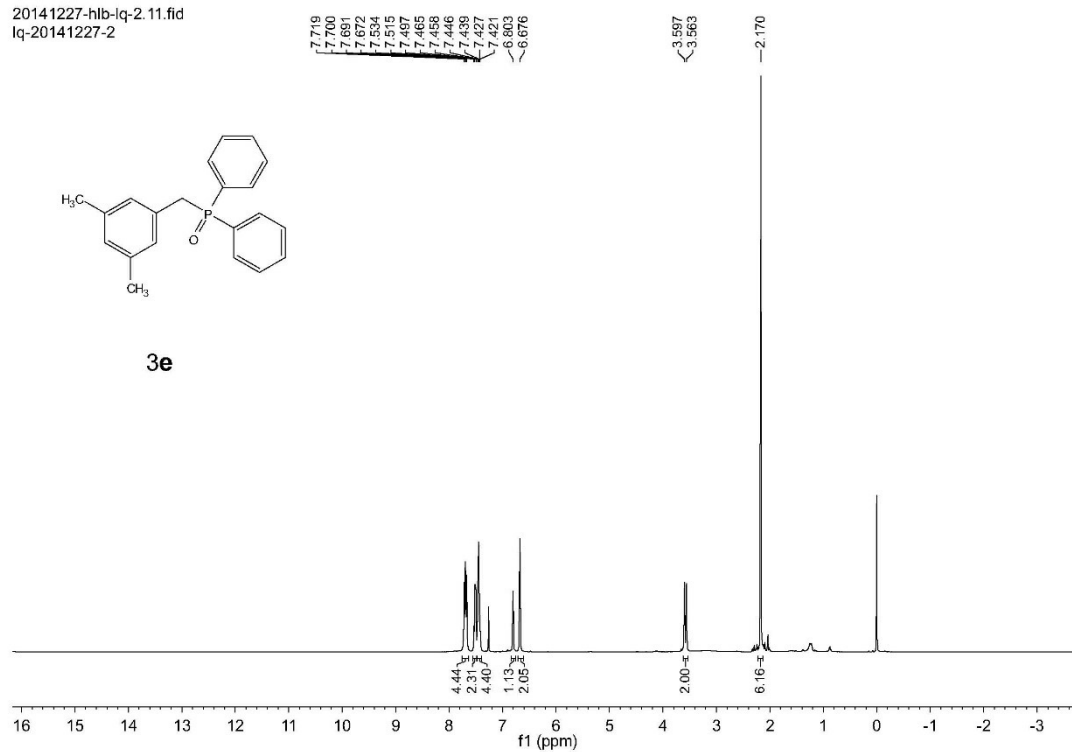

# <sup>13</sup>C NMR

20141227-han-lq-02.20.fid  
lq-20141227-2

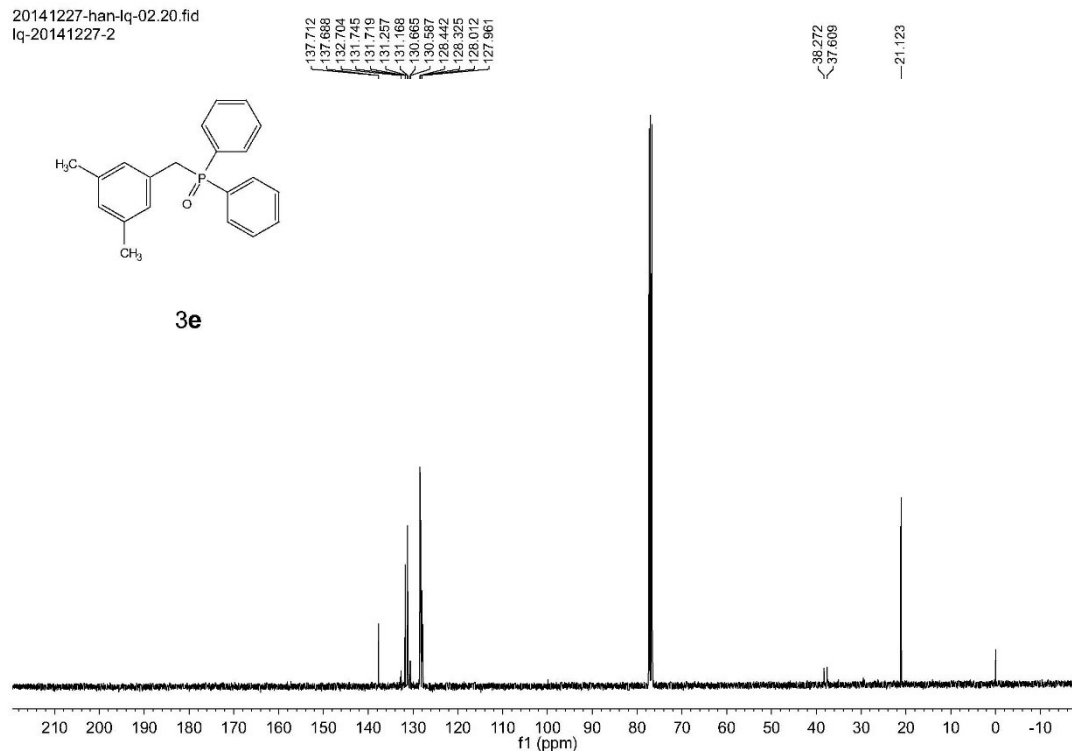

### $^{31}\text{P}$ NMR

20141227-hlb-lq-2.12.fid  
lq-20141227-2

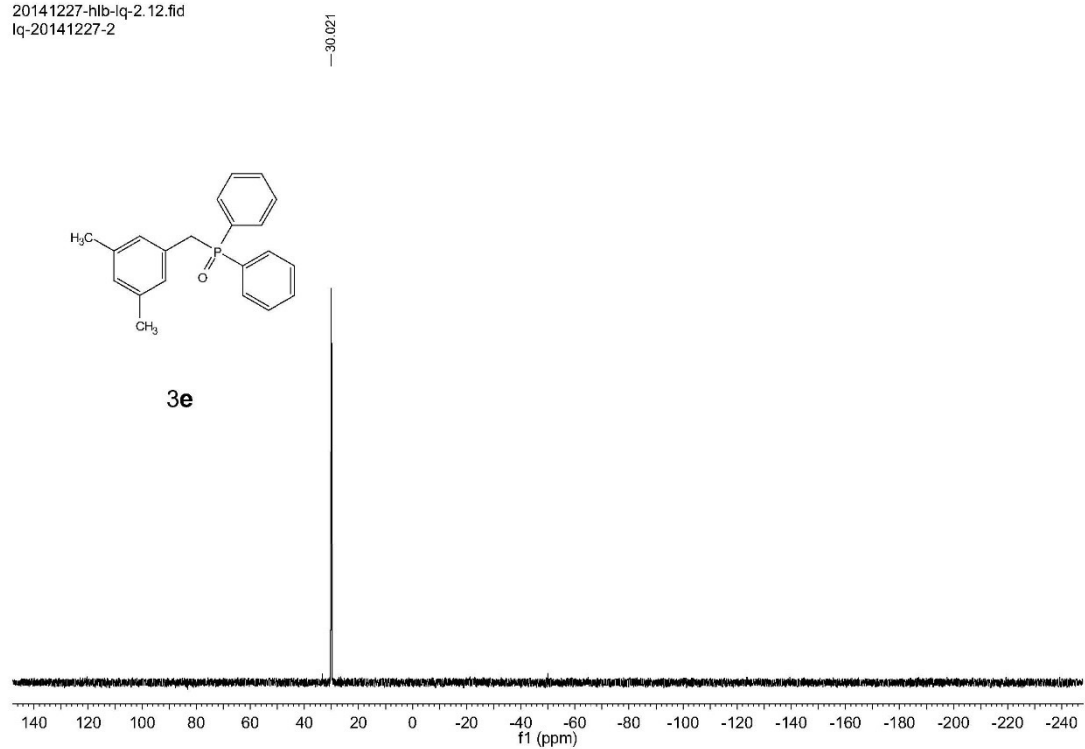

### $^1\text{H}$ NMR

20160121-hlb-lq-01.10.fid  
lq-20160121-01

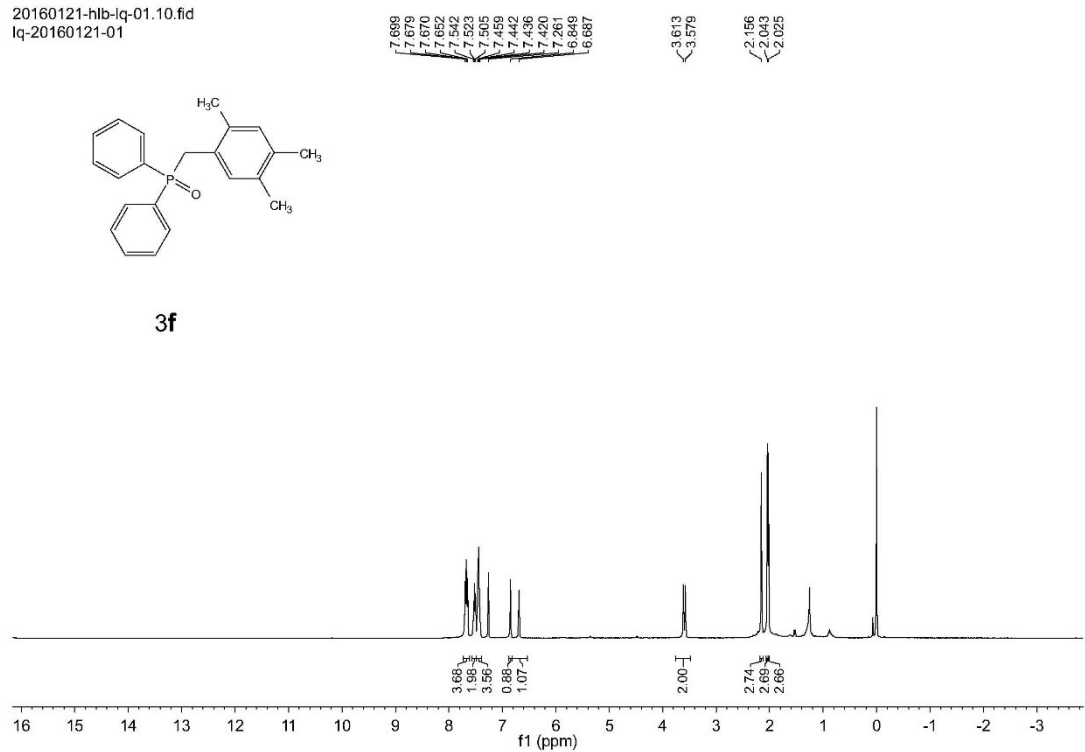

### <sup>13</sup>C NMR

20160121-hlb-lq-01.12.fid  
lq-20160121-01

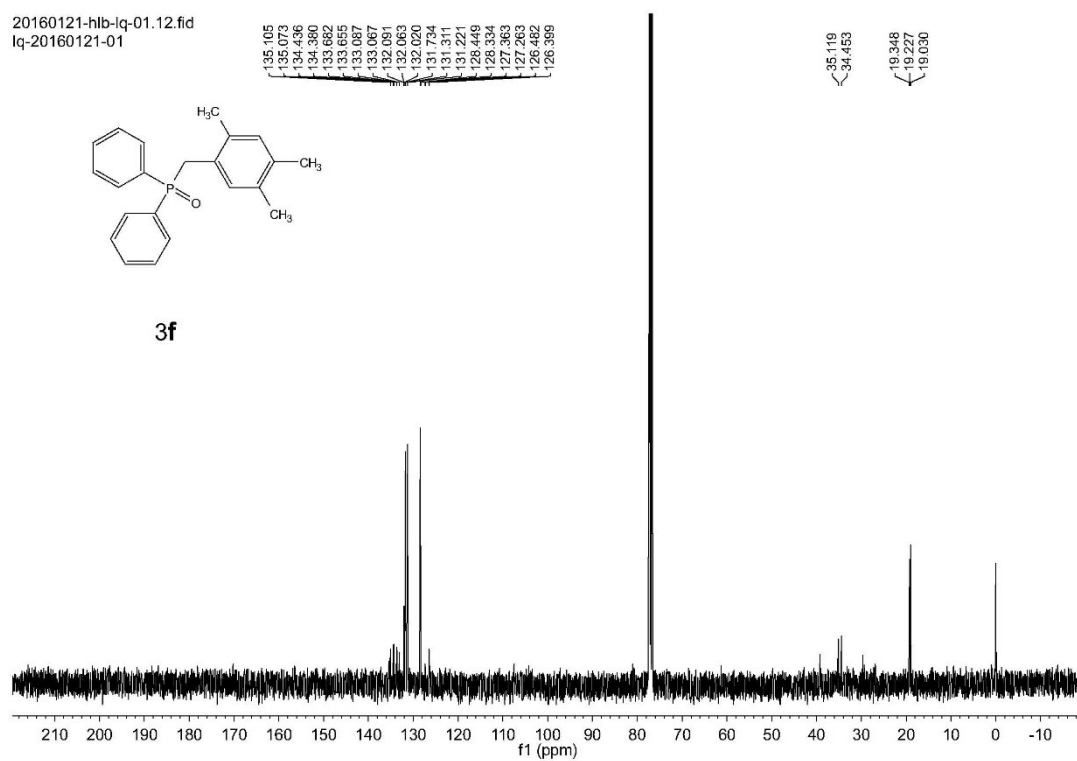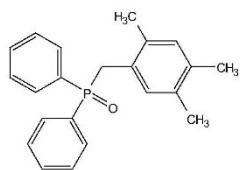

3f

### <sup>31</sup>P NMR

20160121-hlb-lq-01.11.fid  
lq-20160121-01

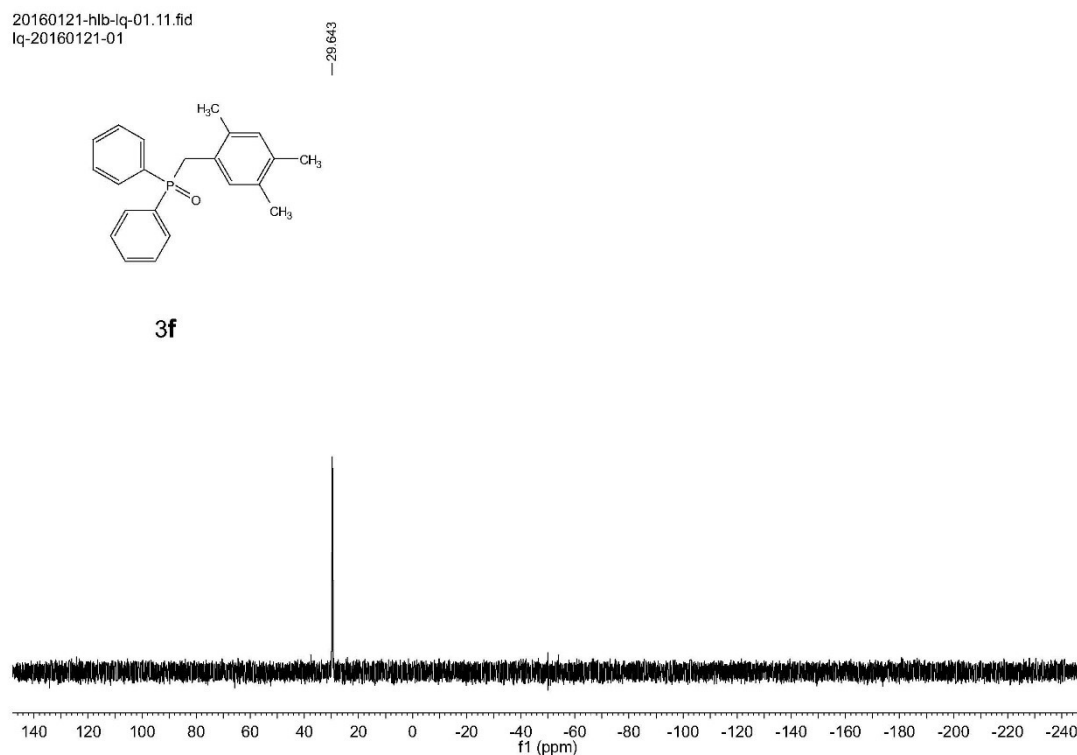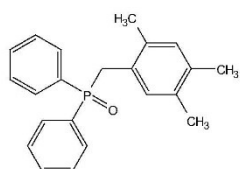

3f



# <sup>1</sup>H NMR

20151223-hlb-lq-03.10.fid  
lq-20151223-03

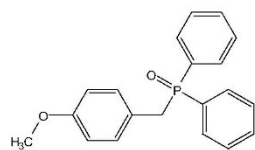

3

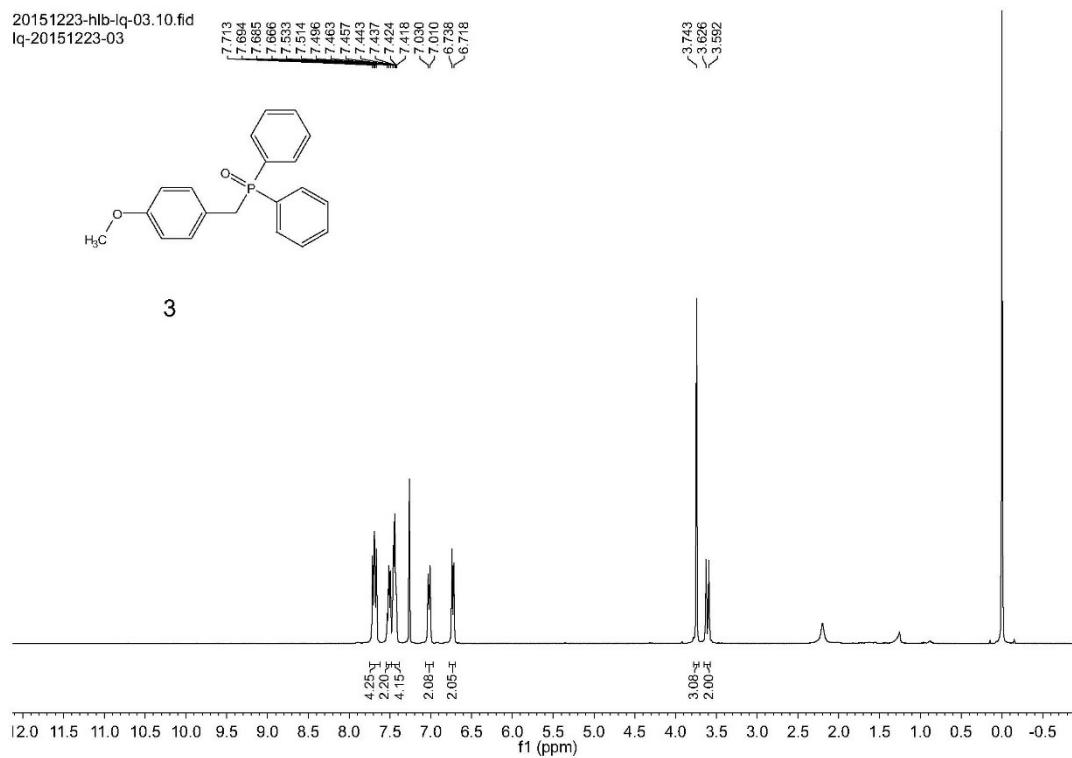

# <sup>13</sup>C NMR

20151223-hlb-lq-04.11.fid  
lq-20151223-04

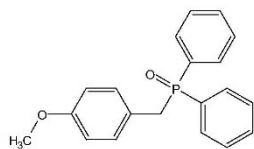

3g

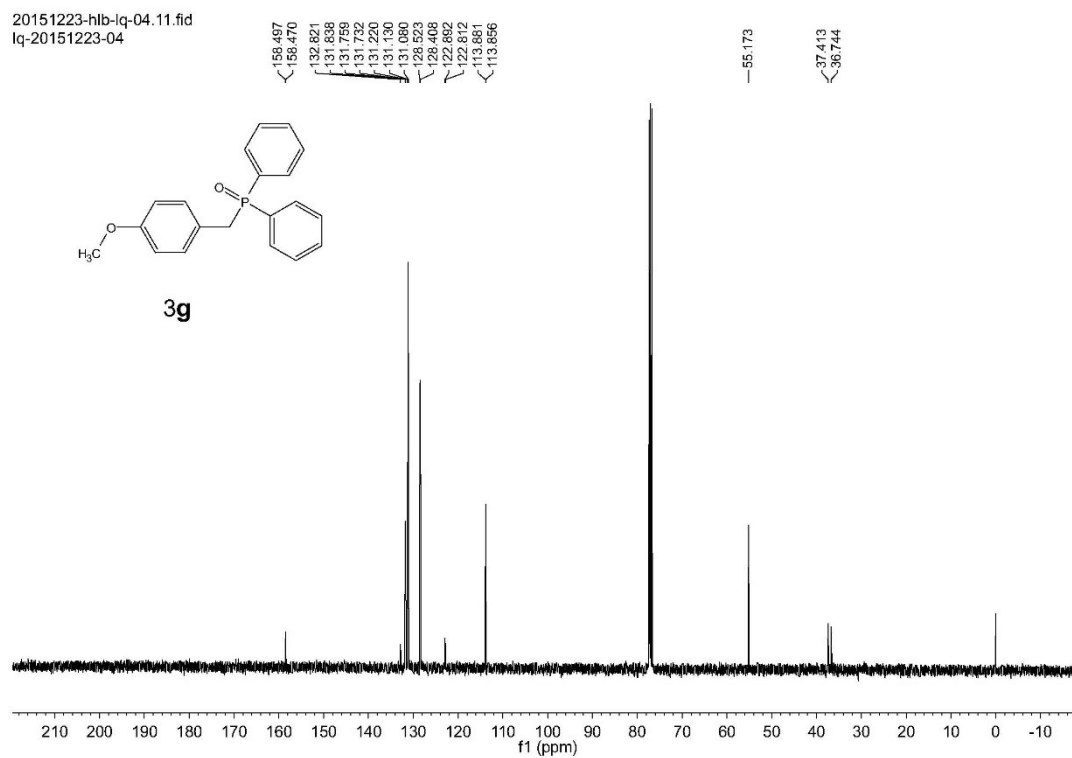

### <sup>31</sup>P NMR

20151223-hlb-lq-03.11.fid  
lq-20151223-03

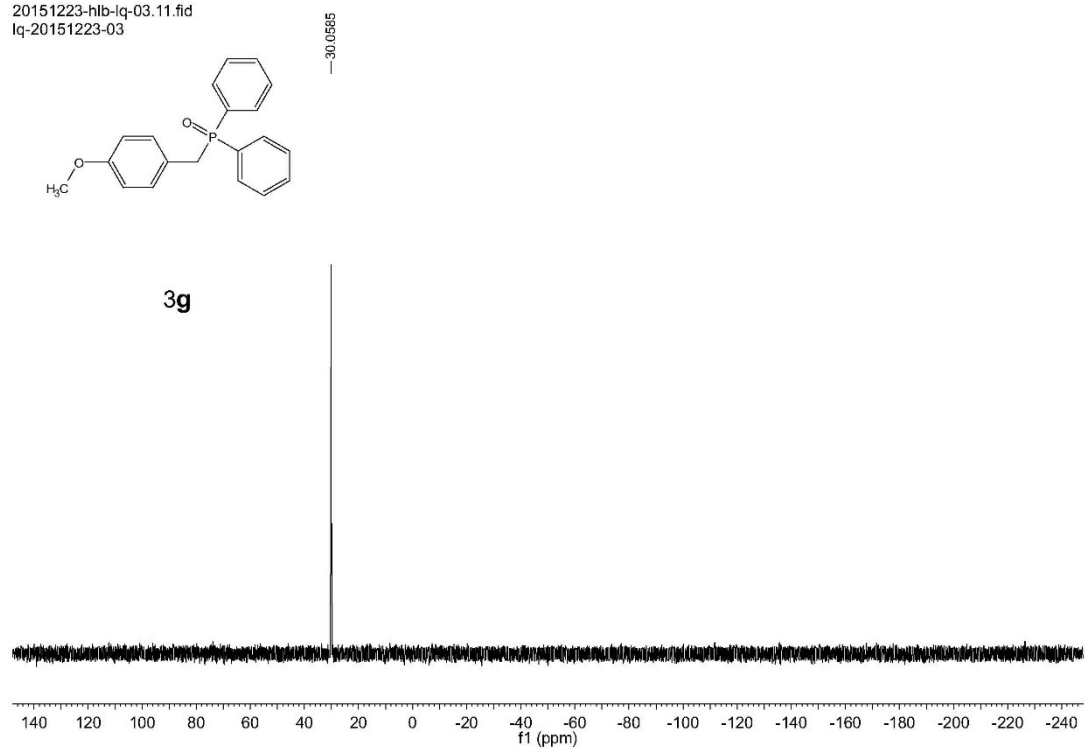

### <sup>1</sup>H NMR

20151225-hlb-lq-1.20.fid  
15c

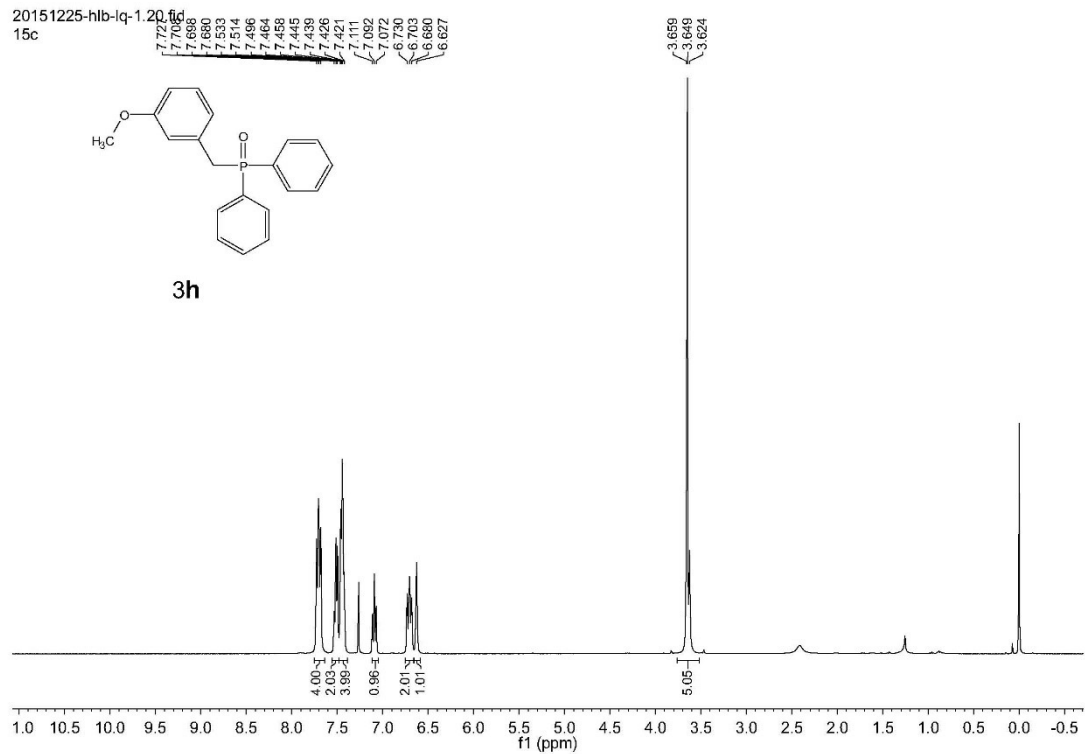

### <sup>13</sup>C NMR

20151225-hlb-lq-2.21.fid  
20151225-lq-2

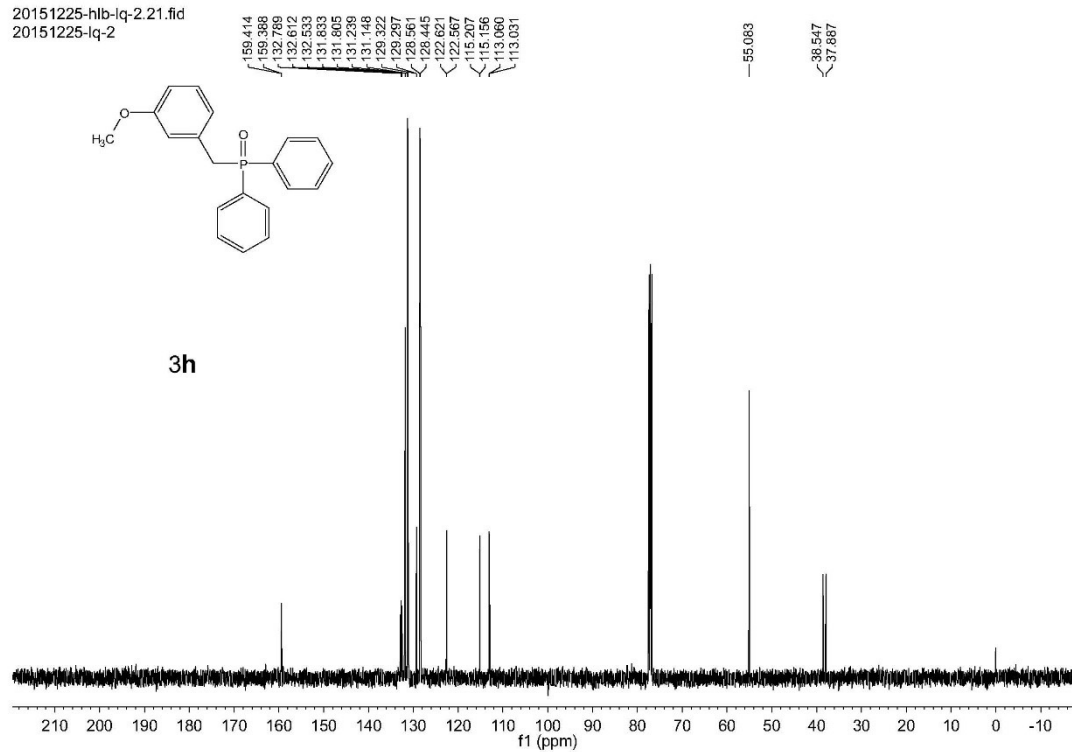

### <sup>31</sup>P NMR

20151225-hlb-lq-1.21.fid  
20151225-lq-1

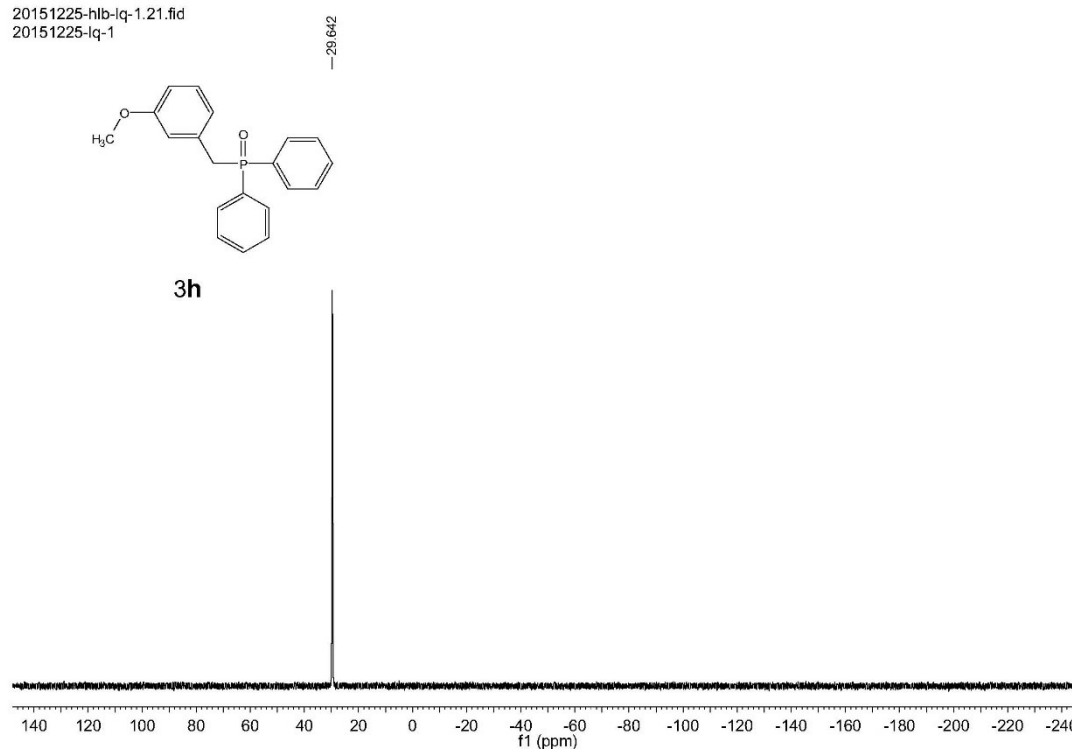

# <sup>1</sup>H NMR

20151223-hlb-lq-01.10.fid  
lq-20151223-01

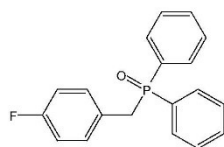

**3i**

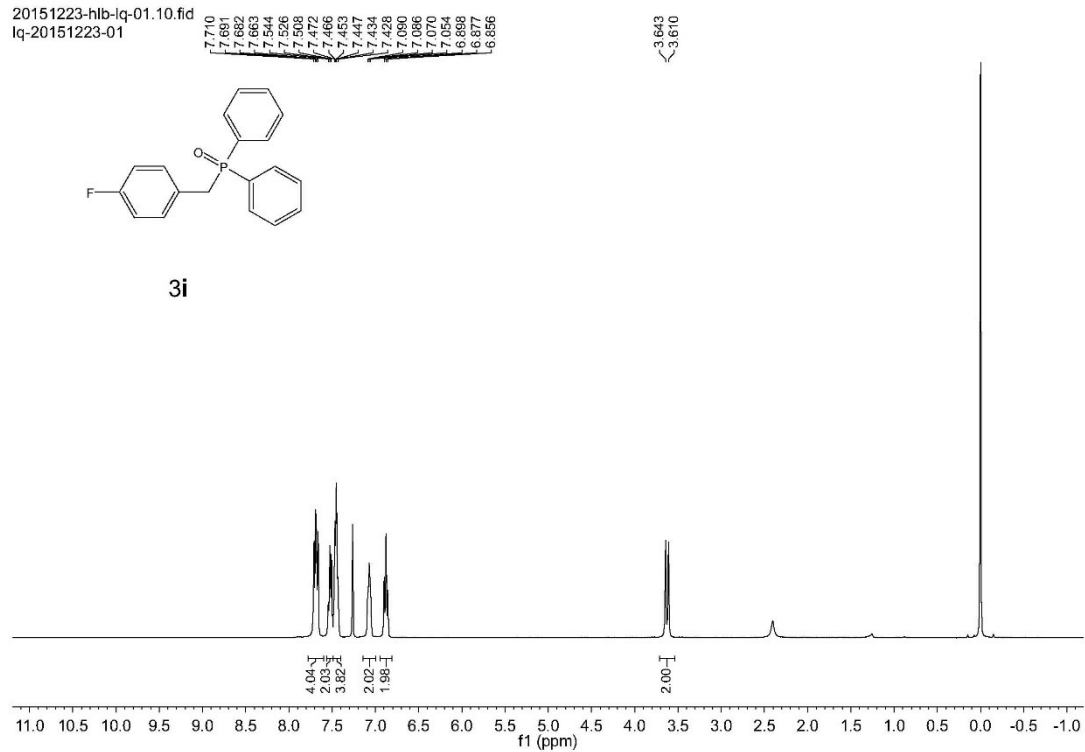

# <sup>13</sup>C NMR

20151223-hlb-lq-02.12.fid  
lq-20151223-02

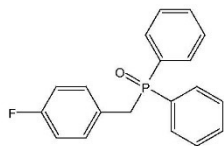

**3i**

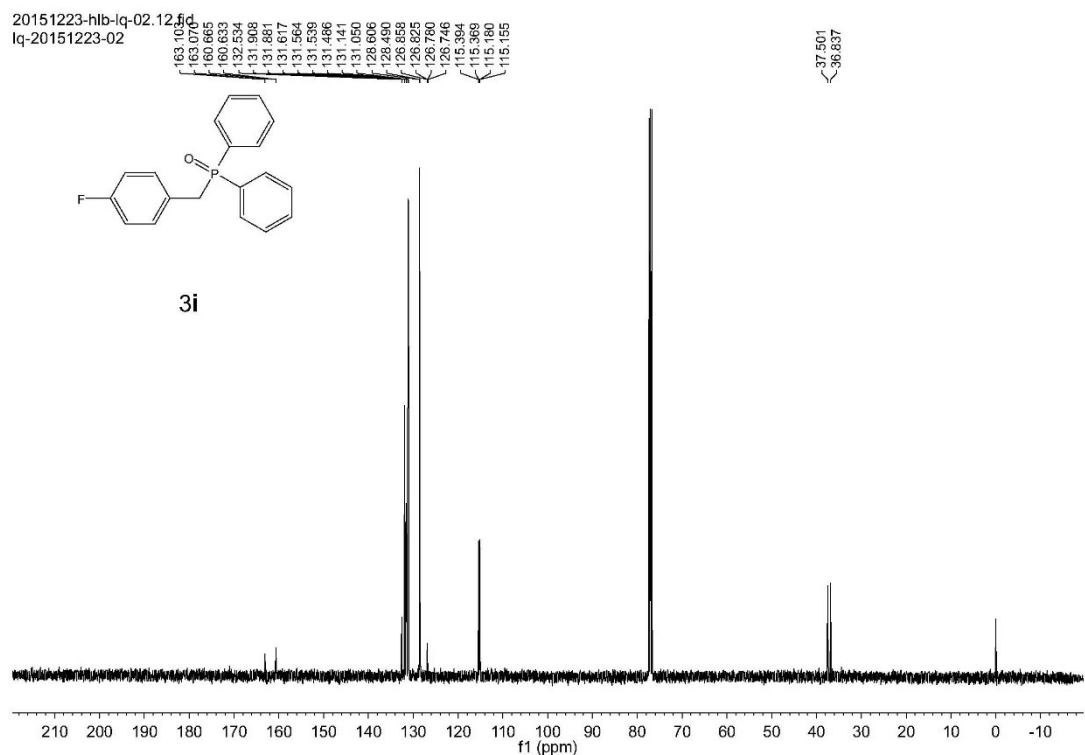

### <sup>31</sup>P NMR

20151223-hlb-lq-01.11.fid  
lq-20151223-01

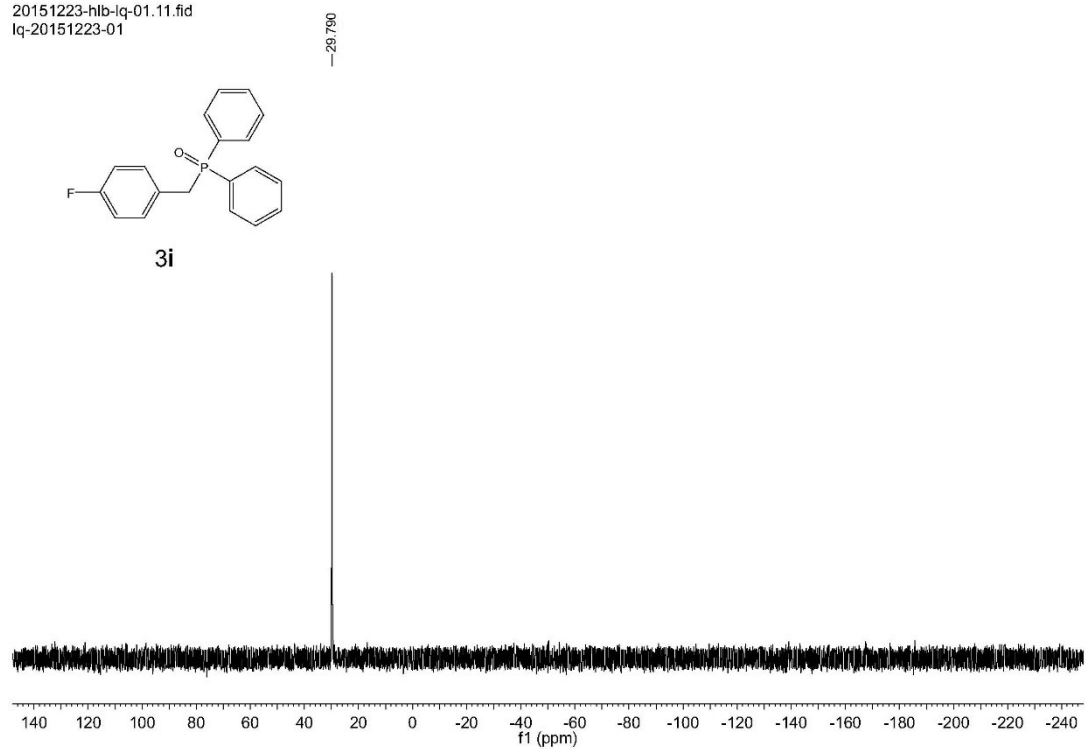

### <sup>1</sup>H NMR

20151009-hlb-lq-20151009-1.31.fid  
1

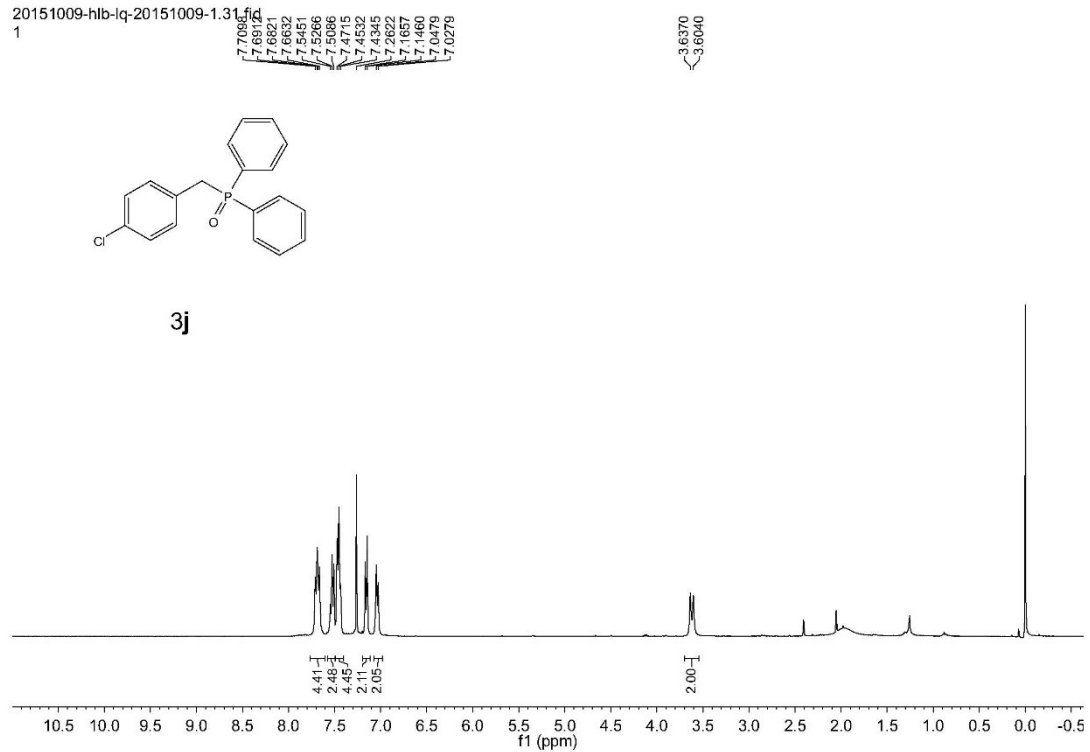

### <sup>13</sup>C NMR

20160111-hlb-lq-02.12.fid  
lq-20160111-2

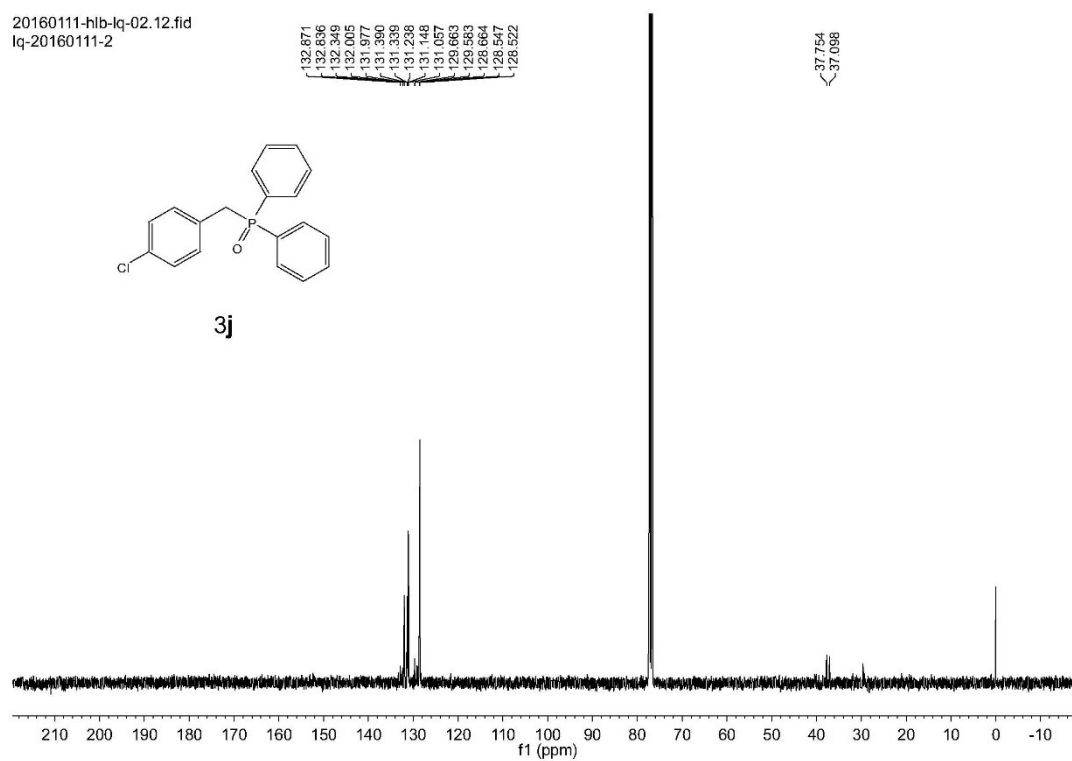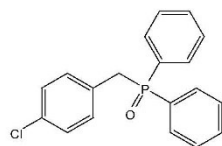

3j

### <sup>31</sup>P NMR

20160111-hlb-lq-02.11.fid  
lq-20160111-2

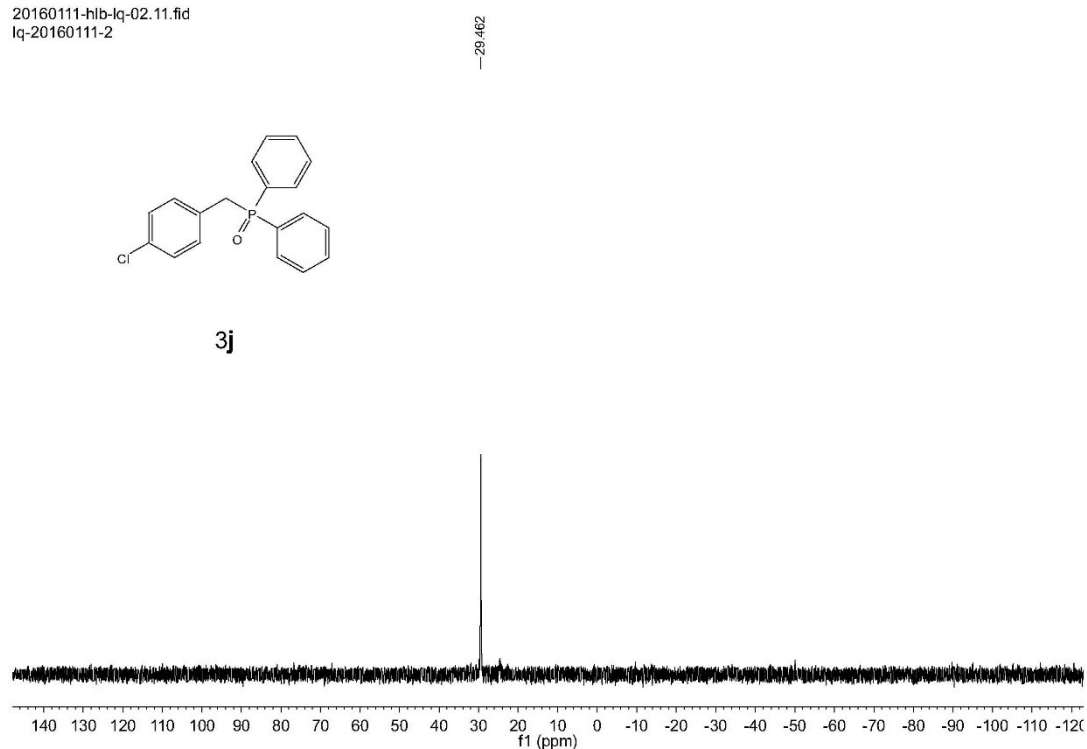

3j

# <sup>1</sup>H NMR

20160112-hlb-lq-03.30.fid  
lq-20160112-3

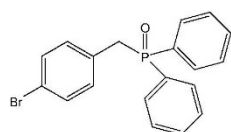

3k

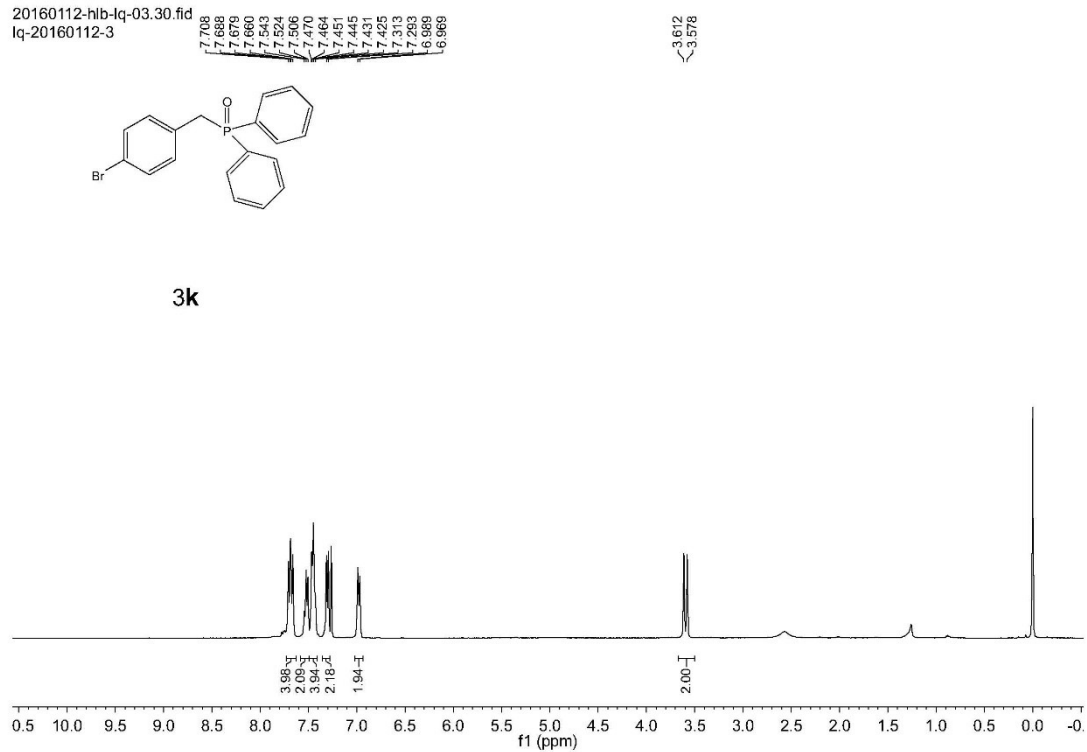

# <sup>13</sup>C NMR

20160112-hlb-lq-03.32.fid  
lq-20160112-3

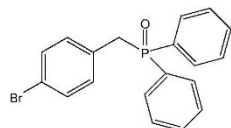

3k

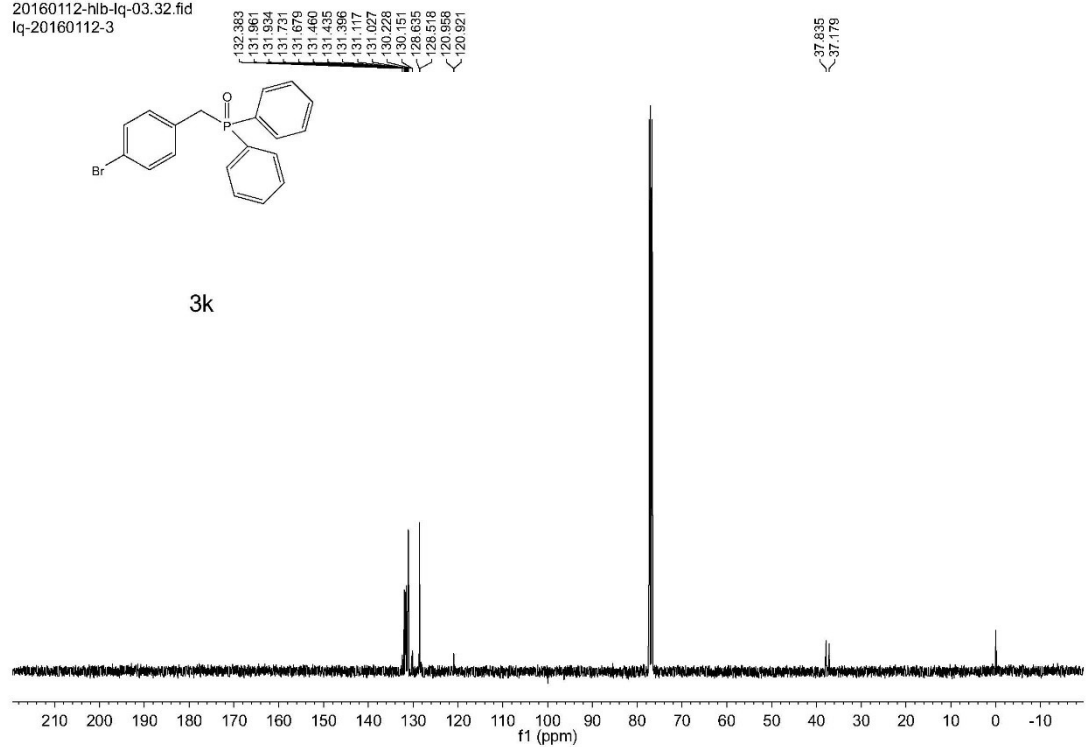

### <sup>31</sup>P NMR

20160112-hlb-lq-03.31.fid  
lq-20160112-3

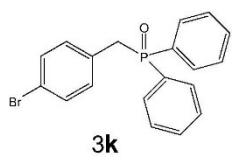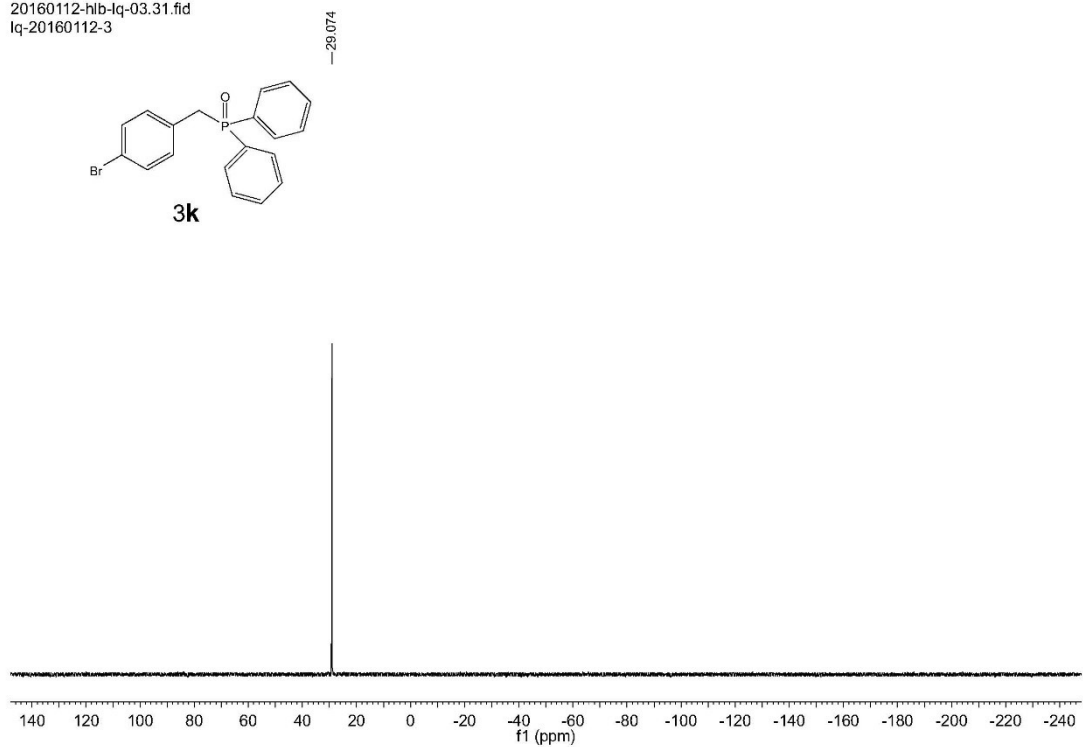

### <sup>1</sup>H NMR

20150413-han-lq-2.10.fid  
lq-20150413-2

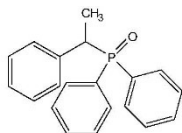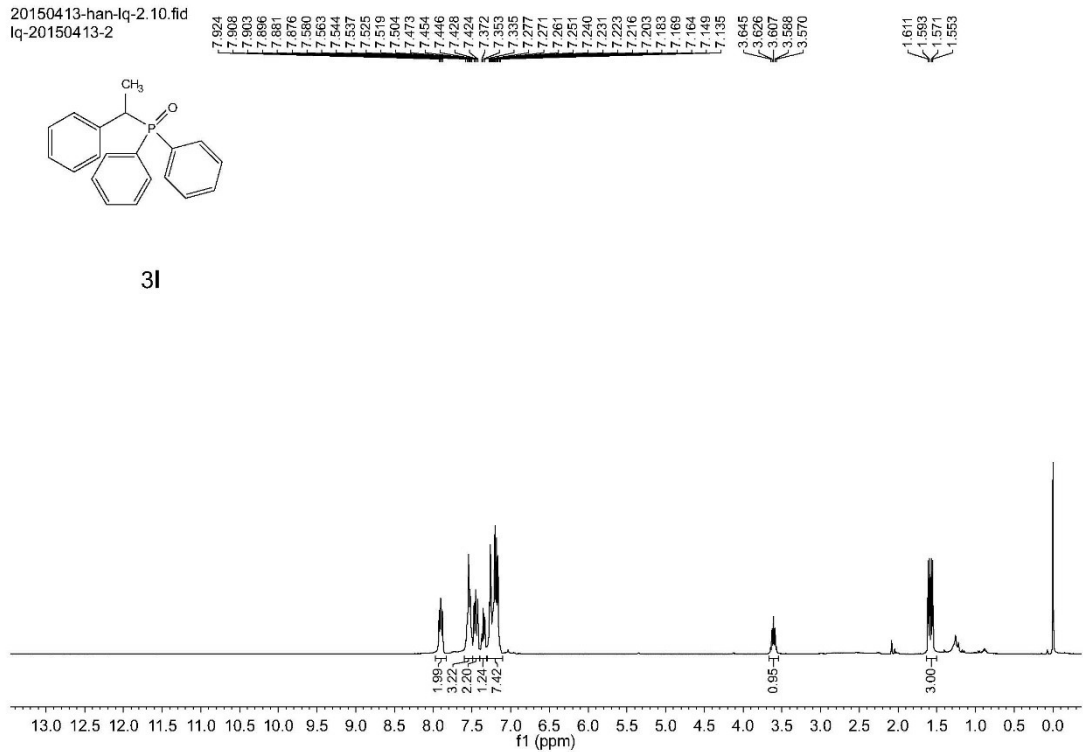



### <sup>13</sup>C NMR

20150413-han-lq-2.12.fid  
lq-20150413-2

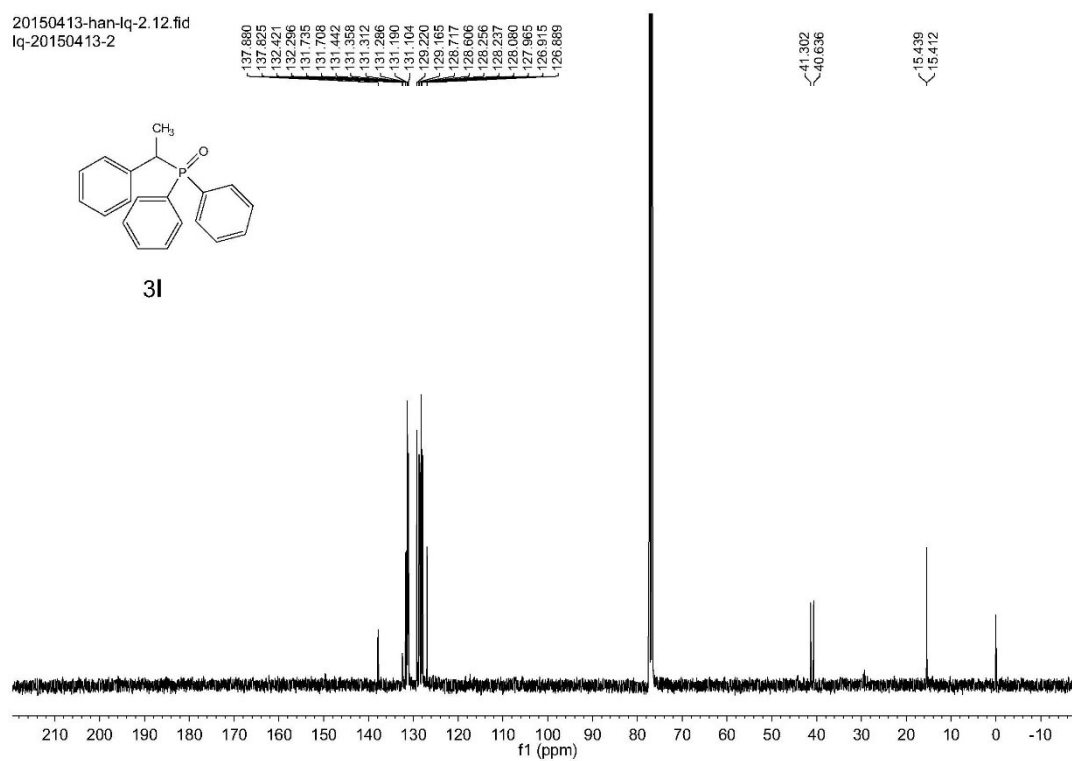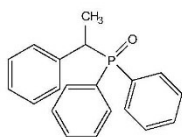

3I

### <sup>31</sup>P NMR

20150413-han-lq-2.11.fid  
lq-20150413-2

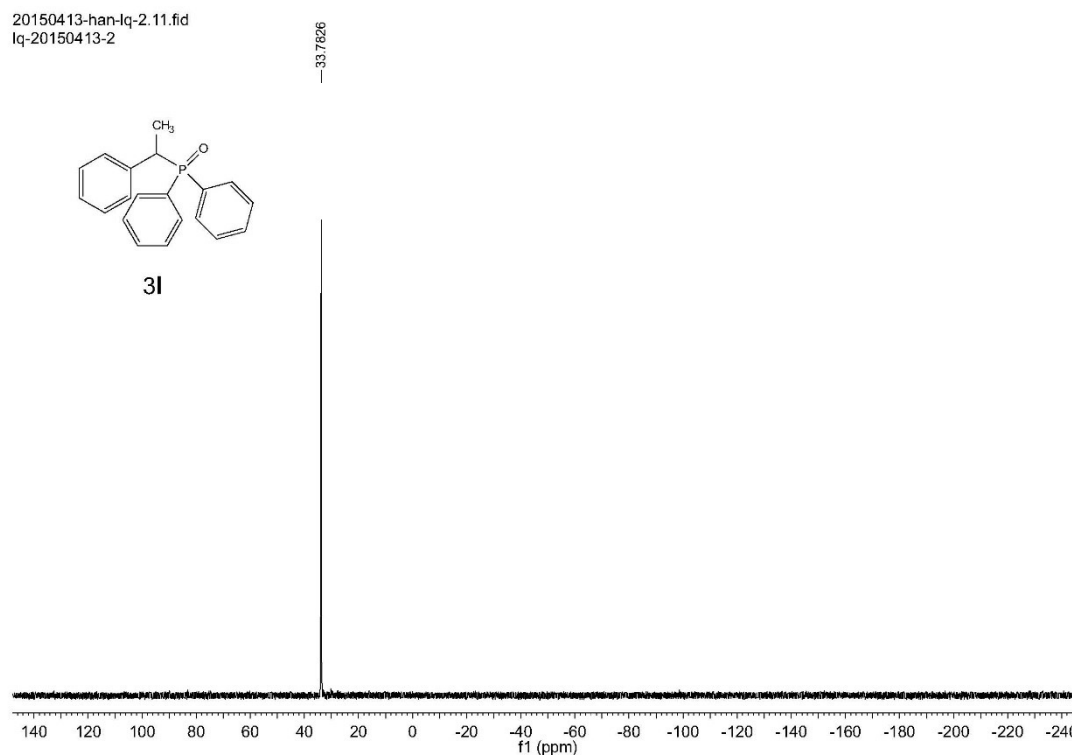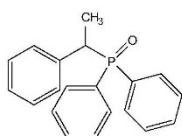

3I

# <sup>1</sup>H NMR

20151216-hlb-lq-05.20.fid  
lq-20150922-11 yibingjiben 2ah

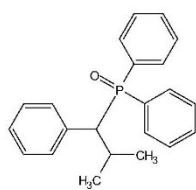

**3m**

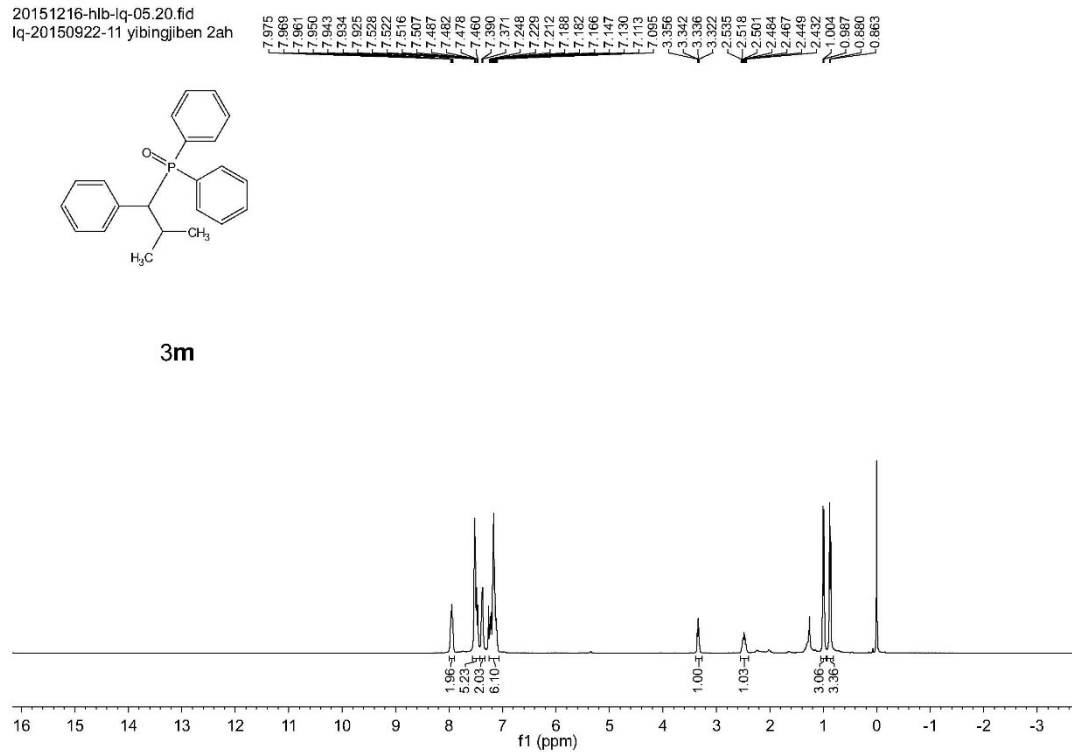

# <sup>13</sup>C NMR

20151216-hlb-lq-05.22.fid  
lq-2015040922-11 yibingjiben 2ah

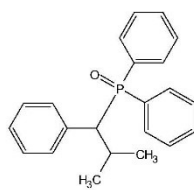

**3m**

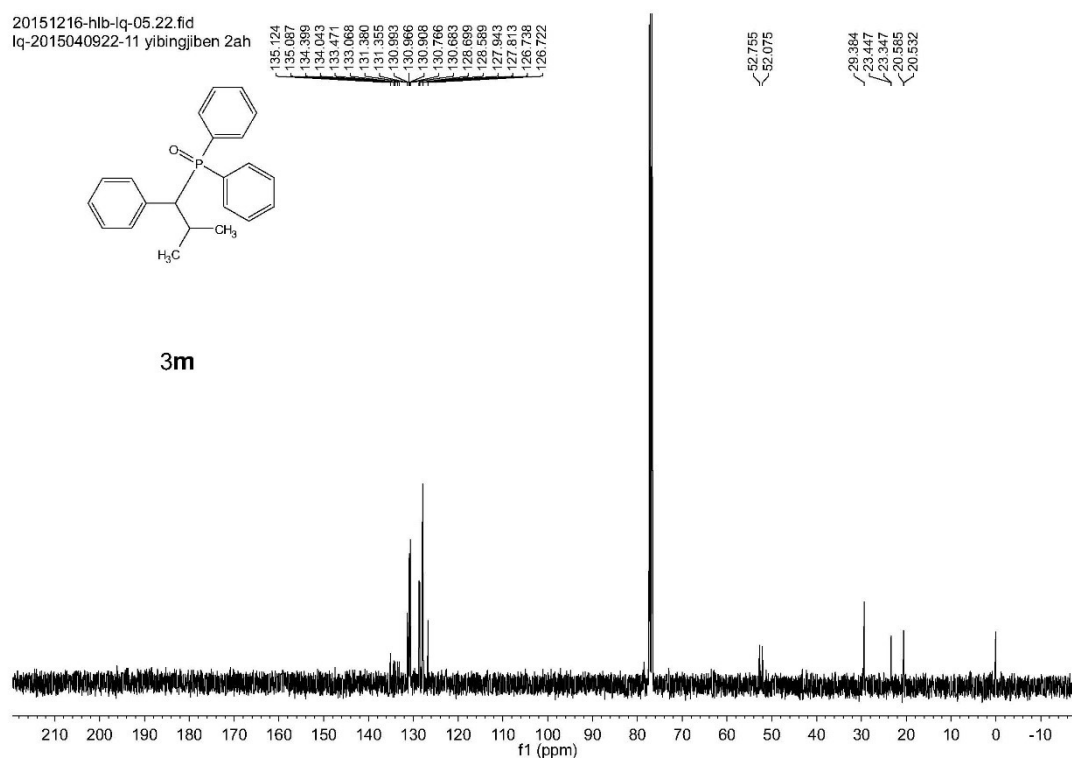

### <sup>31</sup>P NMR

20151216-hlb-lq-05.21.fid  
lq-20150922-11 yibingjiben 2ah

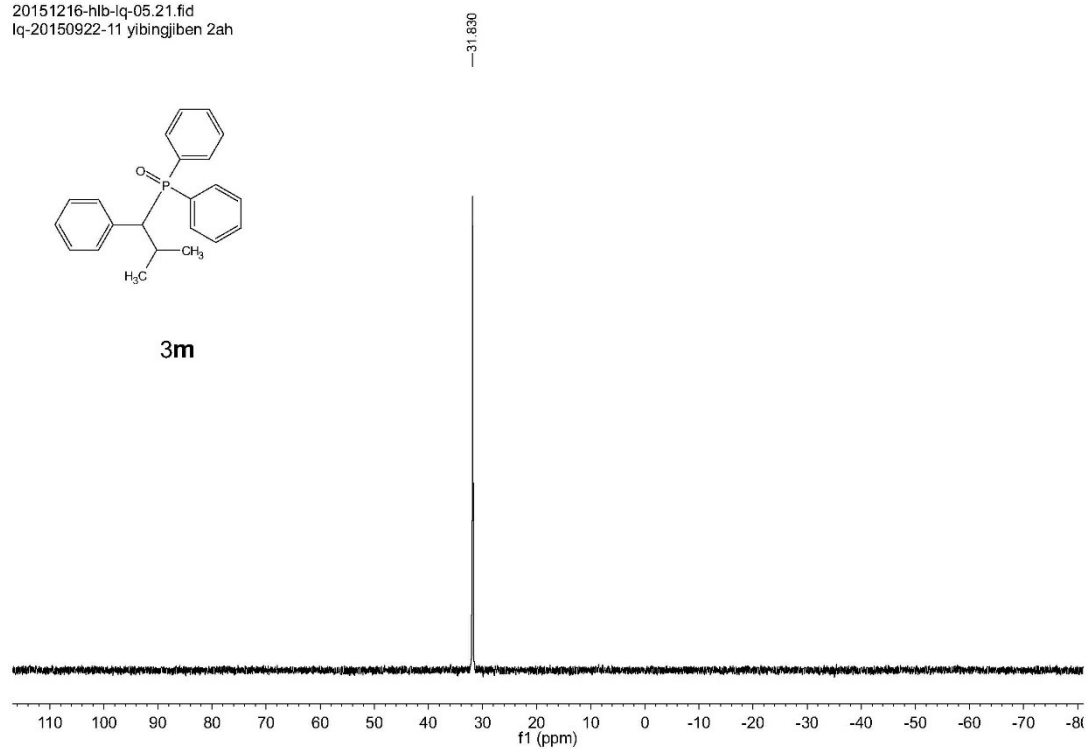

### <sup>1</sup>H NMR

20151222-hlb-lq-1.15.fid  
20151211-lq-1

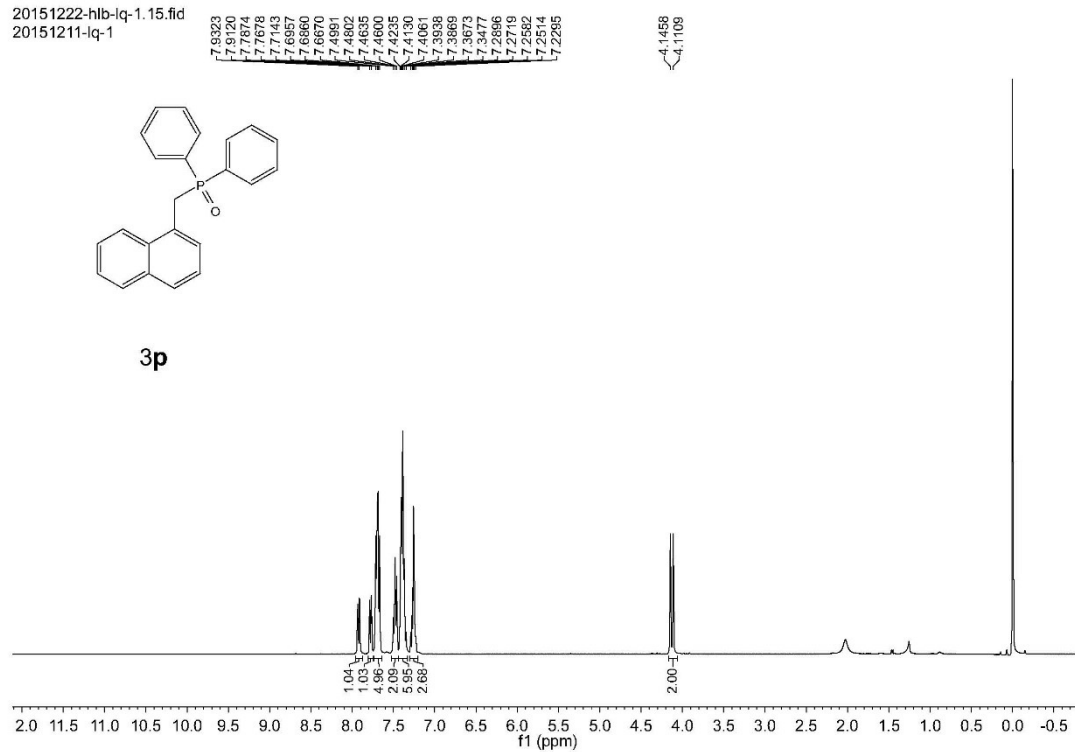

### <sup>13</sup>C NMR

20151222-hlb-lq-2.16.fid  
20151211-lq-2

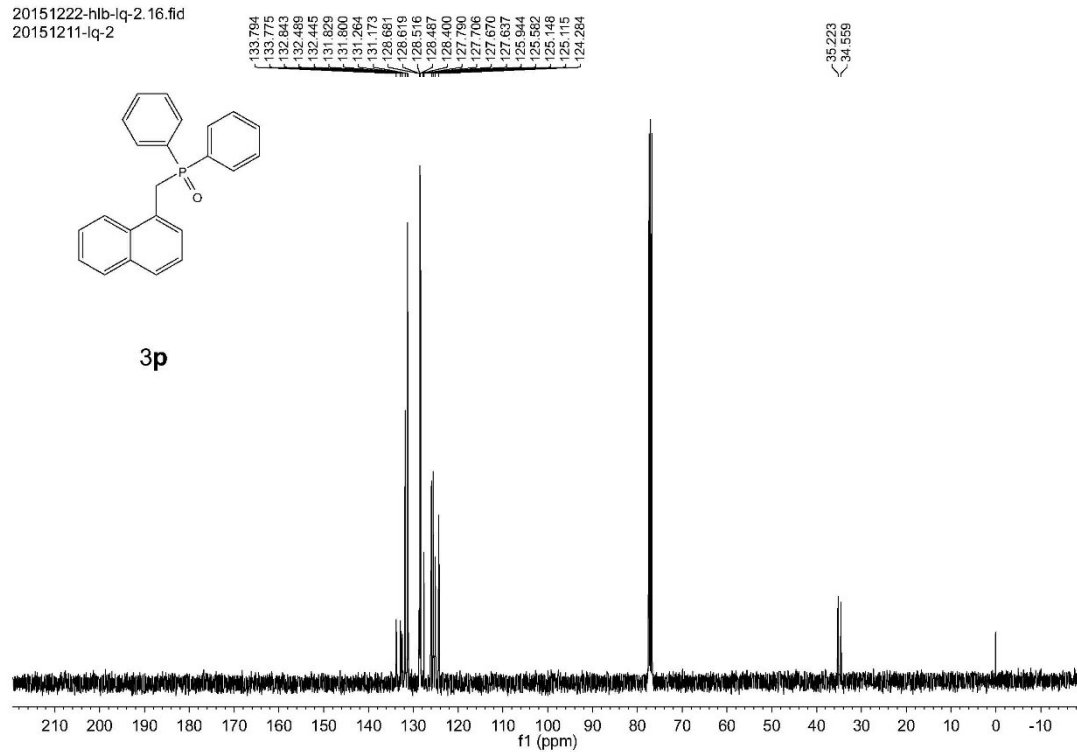

### <sup>31</sup>P NMR

20151222-hlb-lq-1.16.fid  
20151222-lq-1

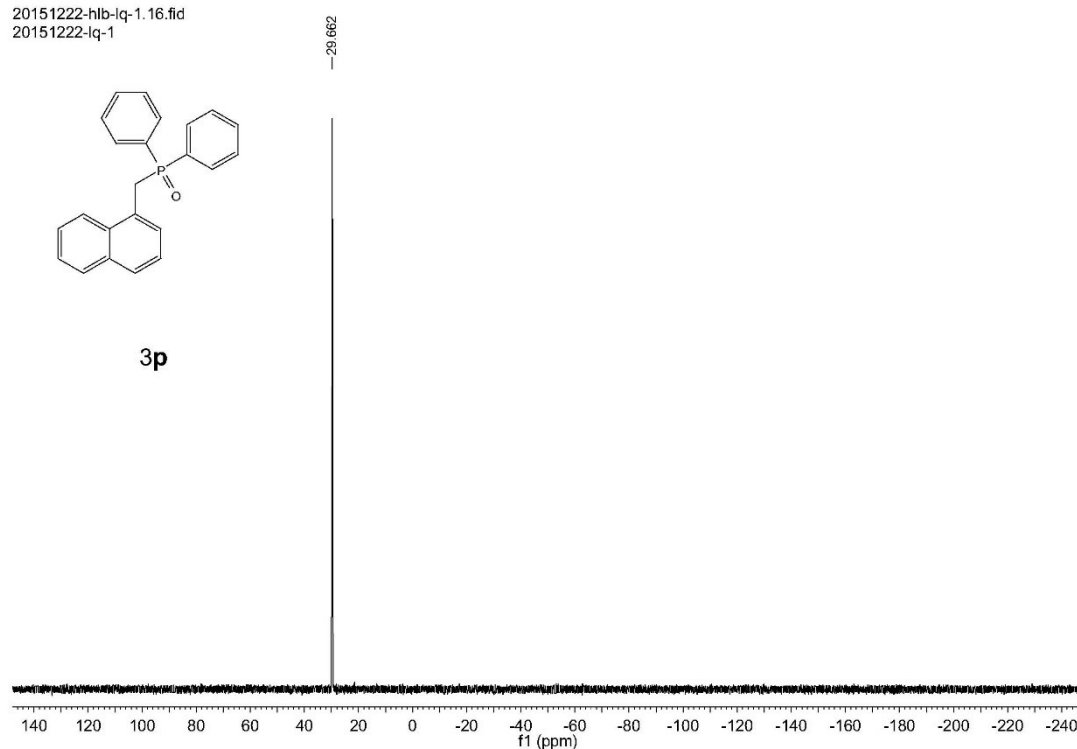

# <sup>1</sup>H NMR

20151225-hlb-lq-9.24.fid  
20151225-lq-9

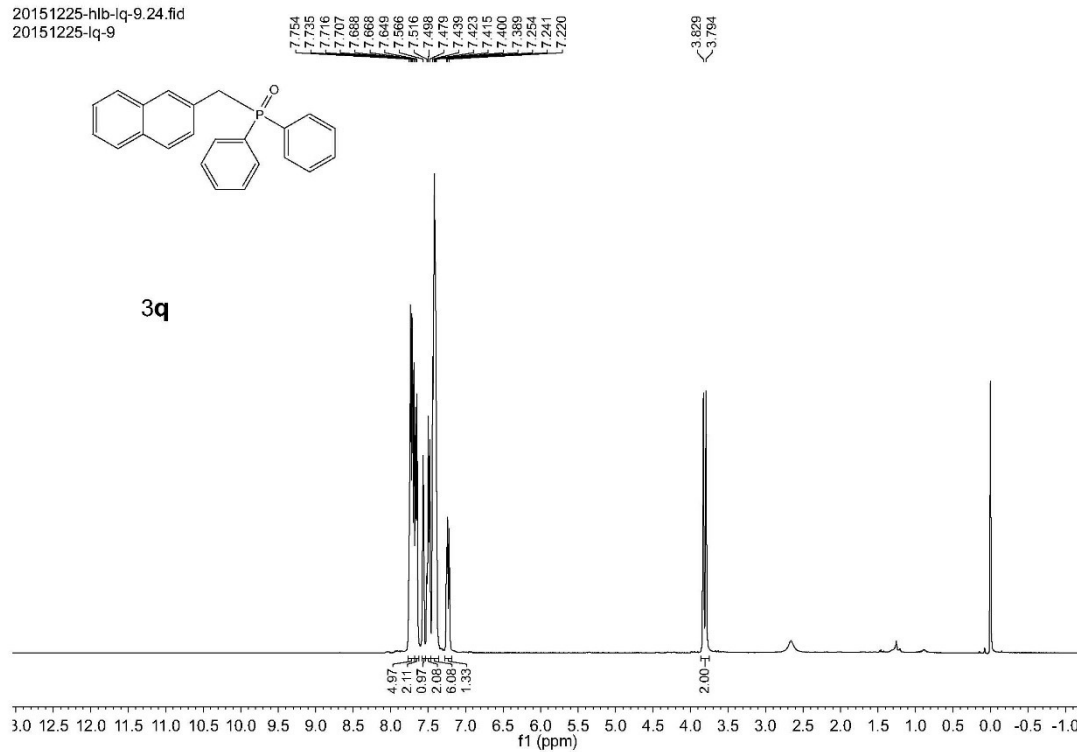

# <sup>13</sup>C NMR

20151227-hlb-lq-02.20.fid  
lq-20151225-10 1-jiajinai

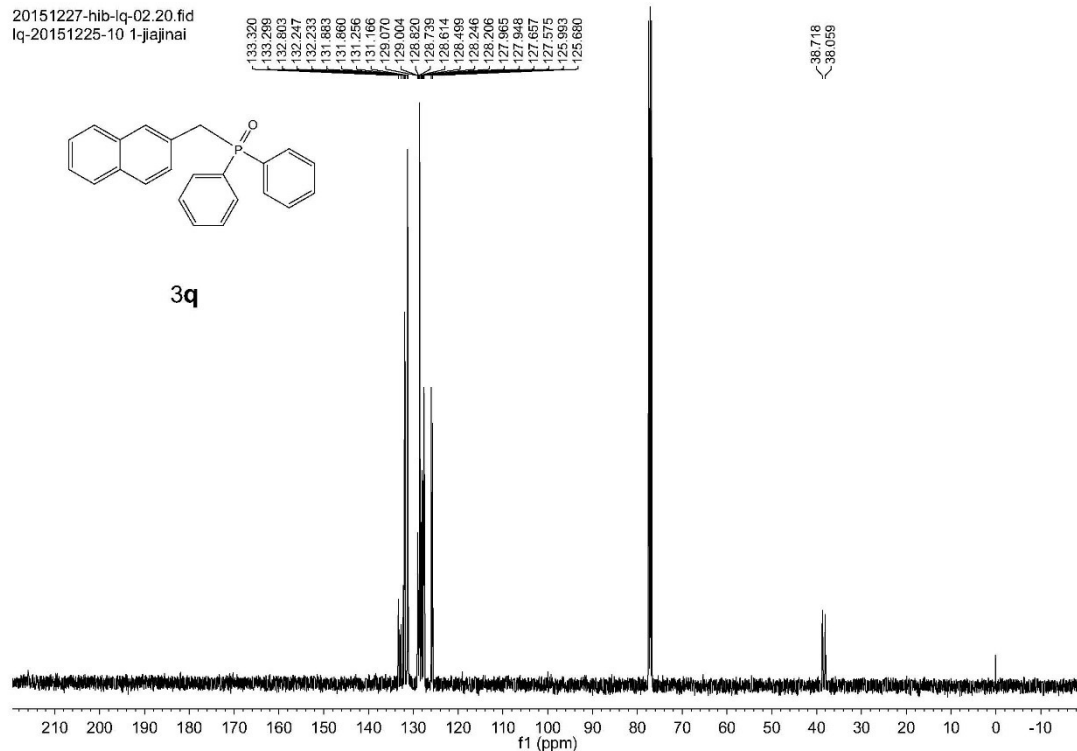

### $^{31}\text{P}$ NMR

20151225-hlb-lq-9.25.fid  
20151225-lq-9

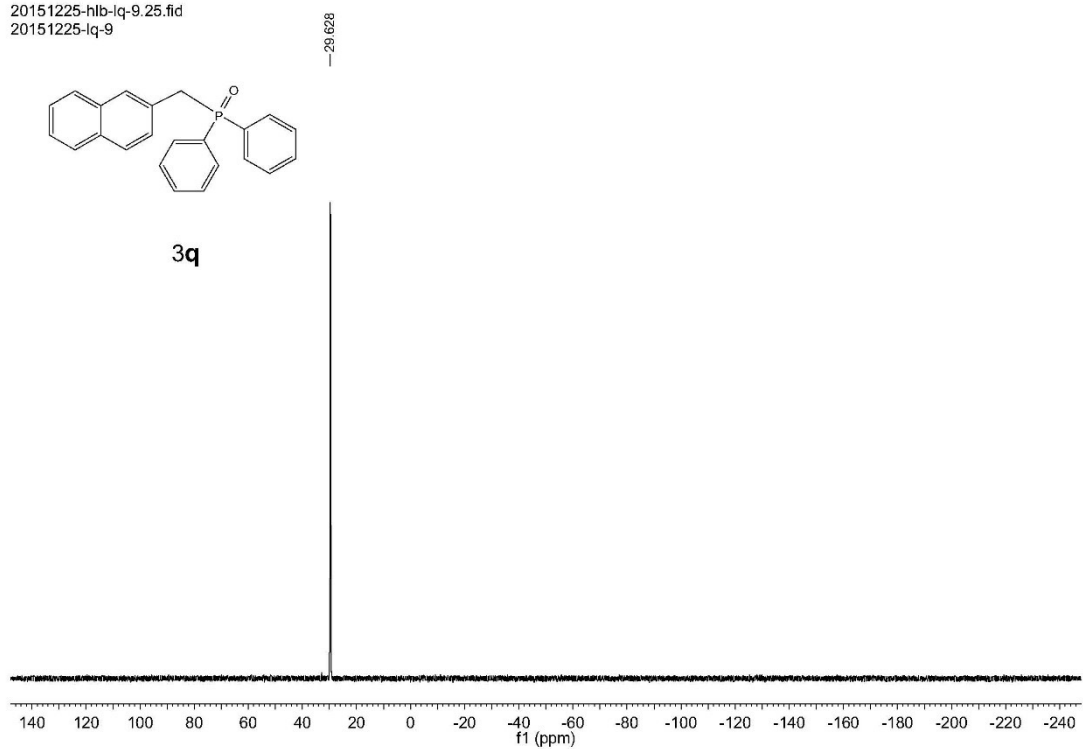

### $^1\text{H}$ NMR

20160104-zyb-zyx-1.21.fid  
zyx-01

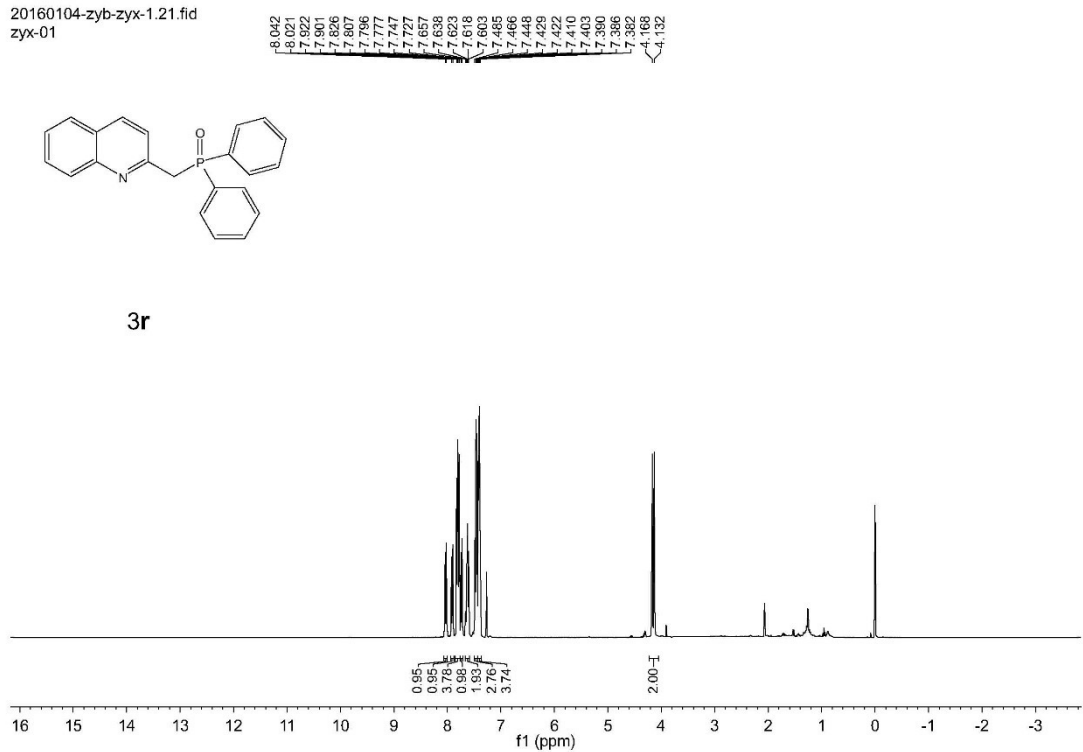

### <sup>13</sup>C NMR

20160104-hlb-lq-06.30.fid  
lq-2060104-01 2-jajikuilin

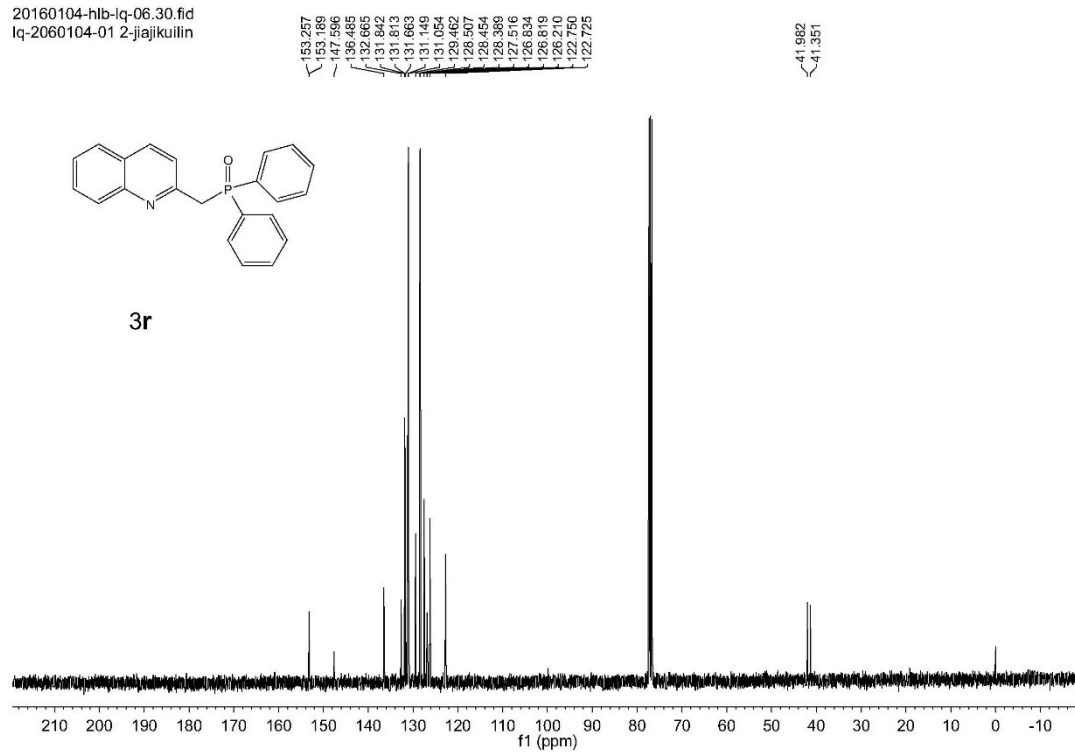

### <sup>31</sup>P NMR

20160104-zyb-zyx-1.22.fid  
zyx-01

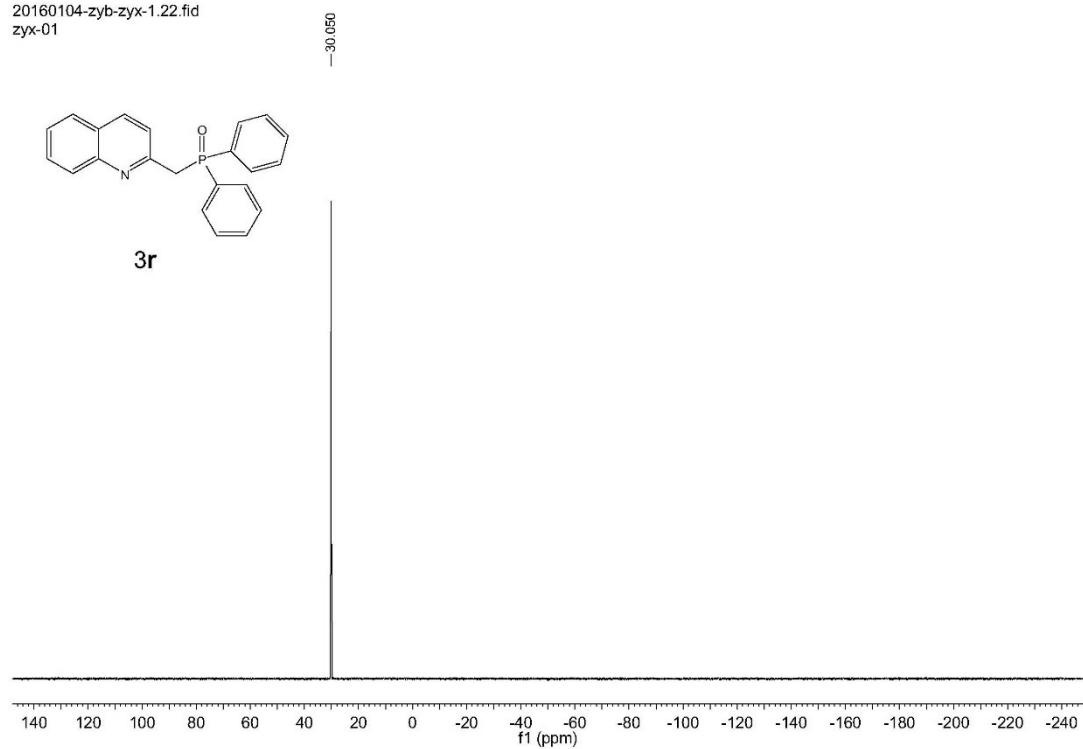

# <sup>1</sup>H NMR

20151222-hlb-lq-3.16.fid  
20151211-lq-3

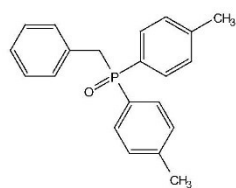

3s

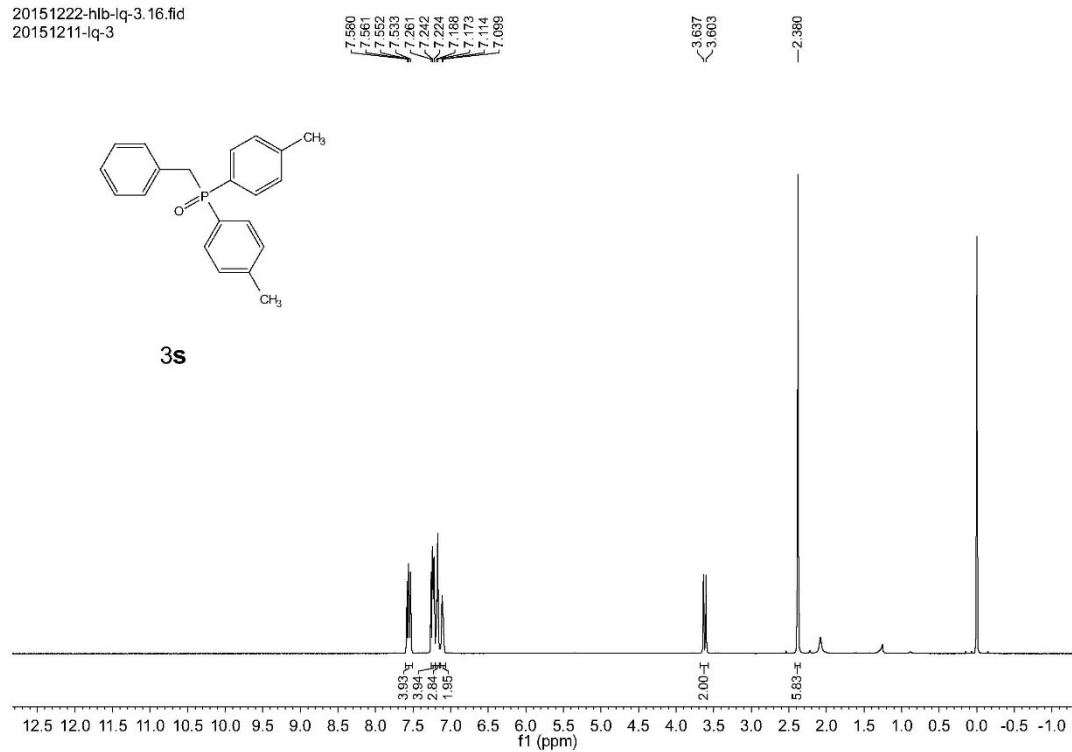

# <sup>13</sup>C NMR

20151222-hlb-lq-4.17.fid  
20151211-lq-4

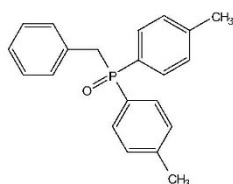

3s

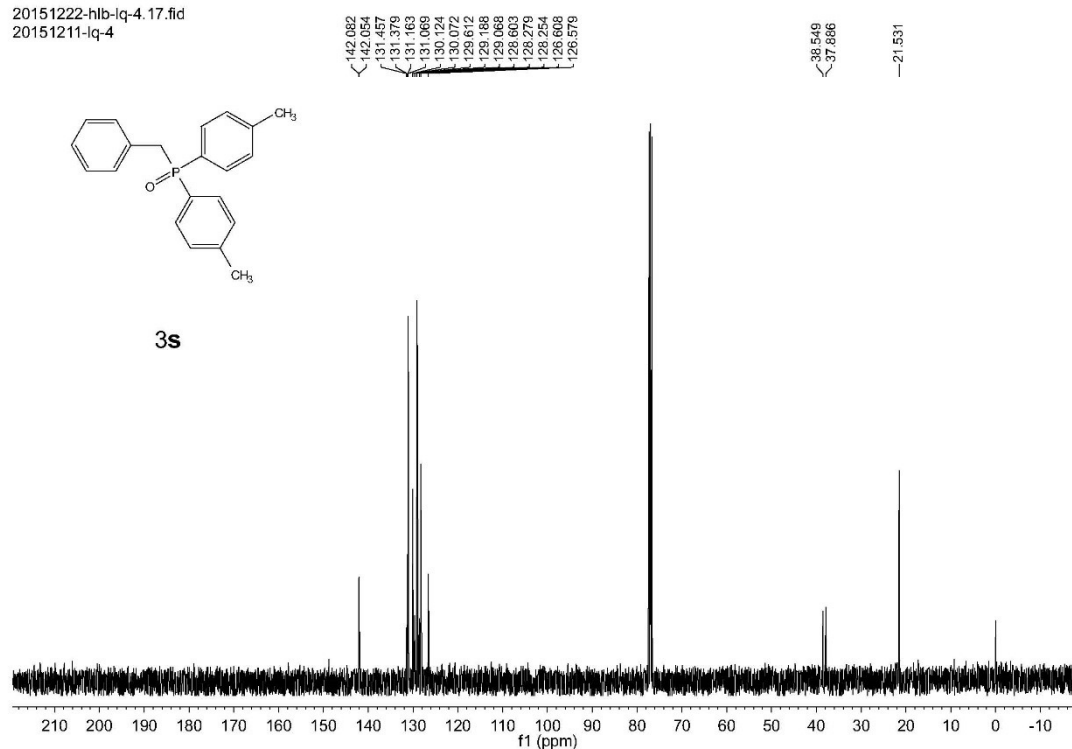



### <sup>31</sup>P NMR

20151222-hlb-lq-3.17.fid  
20151211-lq-3

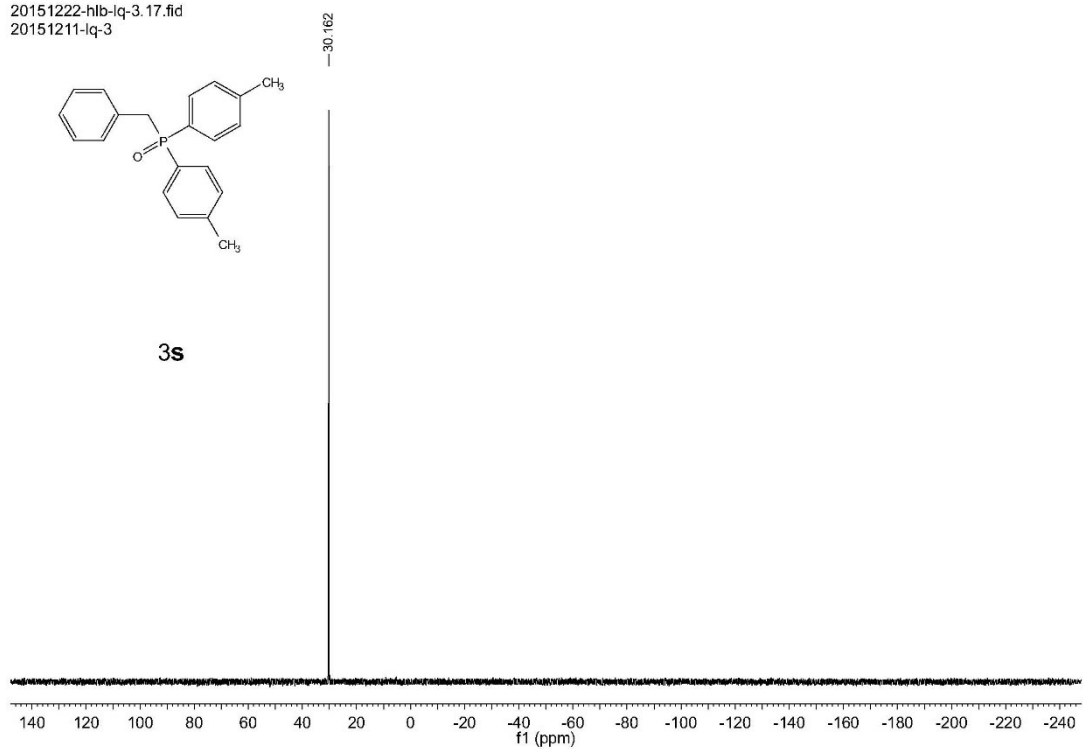

### <sup>1</sup>H NMR

20151225-hlb-lq-3.21.fid  
20151225-lq-3

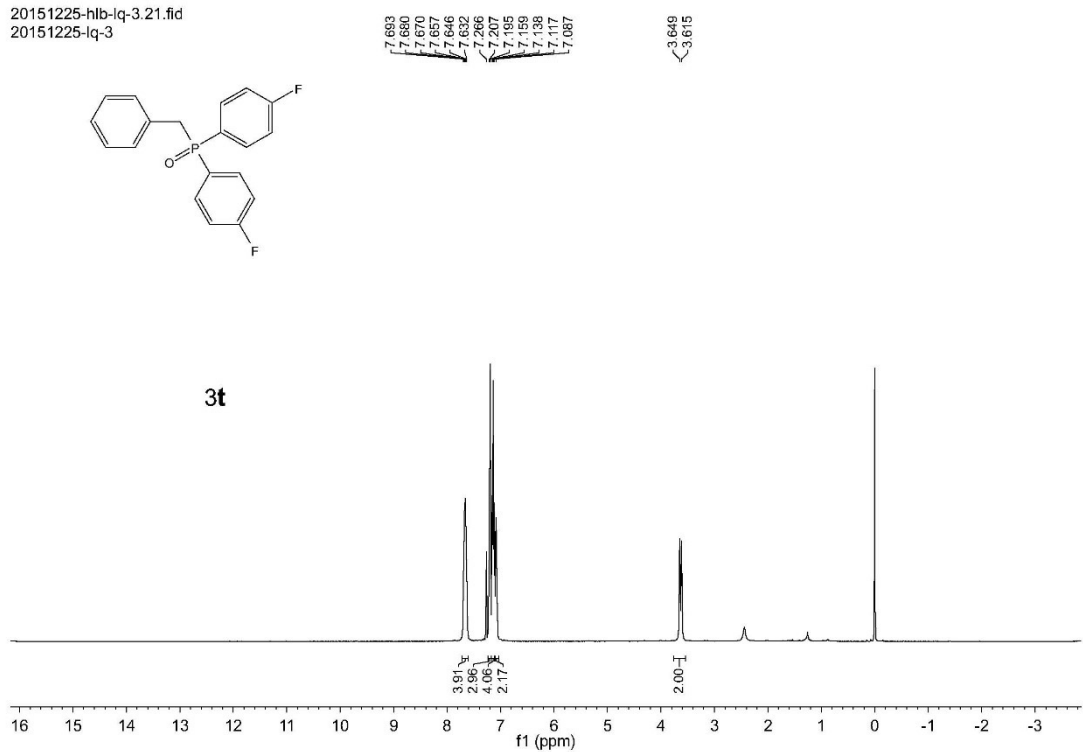

### <sup>13</sup>C NMR

20151225-hlb-lq-4.22.fid  
20151225-lq-4

166.280  
166.249  
163.758  
163.728  
133.707  
133.620  
131.117  
130.717  
130.638  
130.115  
130.063  
128.515  
128.490  
127.483  
127.449  
127.029  
126.999  
116.158  
116.031  
115.945  
115.818

38.690  
38.018

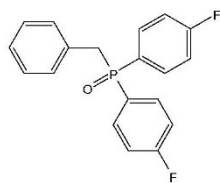

**3t**

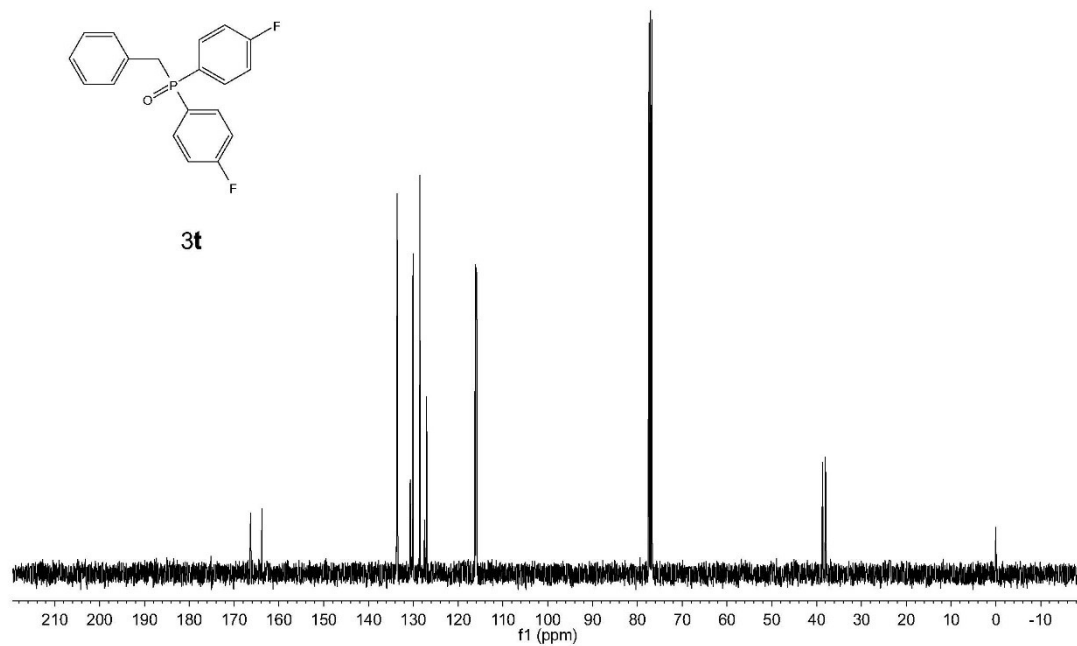

### <sup>31</sup>P NMR

20151225-hlb-lq-3.22.fid  
20151225-lq-3

28.617

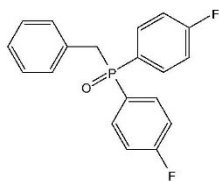

**3t**

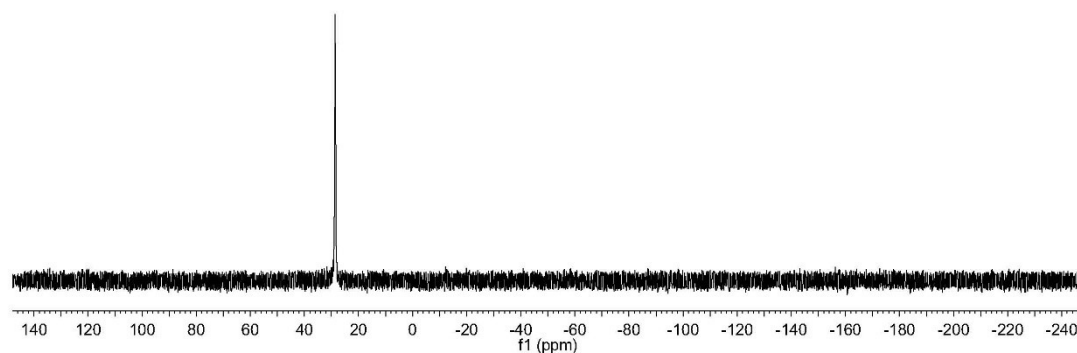

# <sup>1</sup>H NMR

20151225-hlb-lq-7.23.fid  
20151225-lq-7

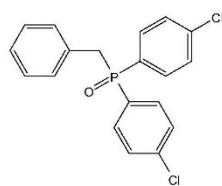

**3u**

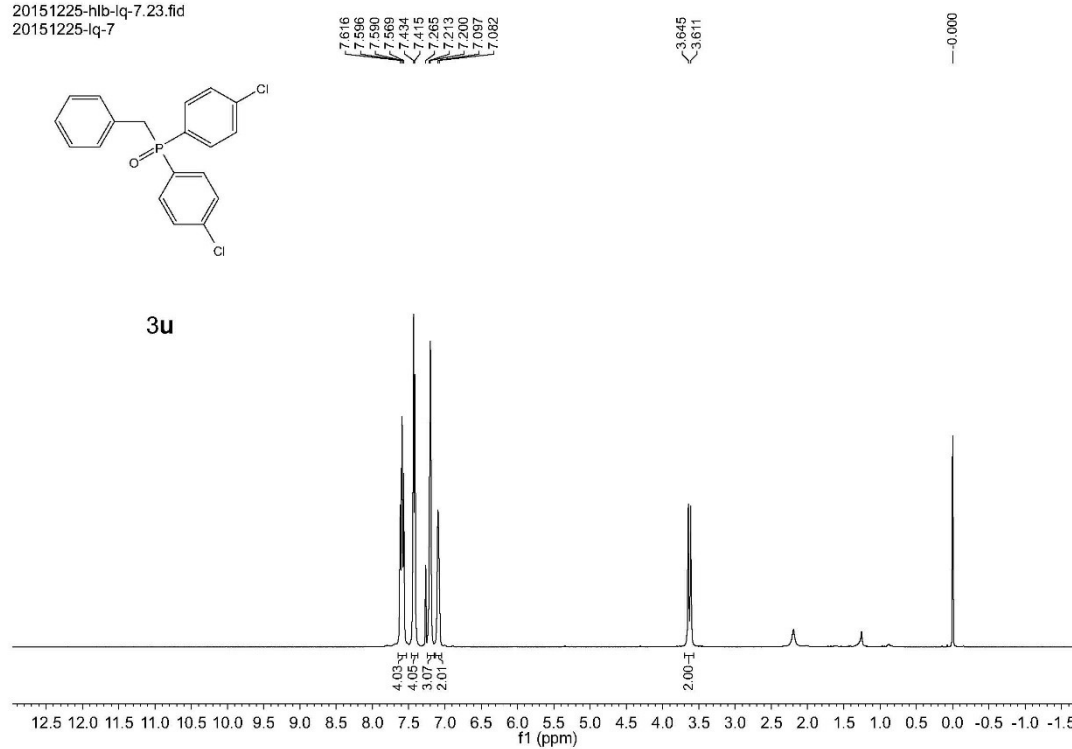

# <sup>13</sup>C NMR

20151225-hlb-lq-8.24.fid  
20151225-lq-8

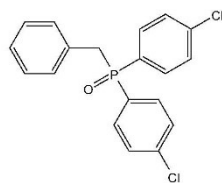

**3u**

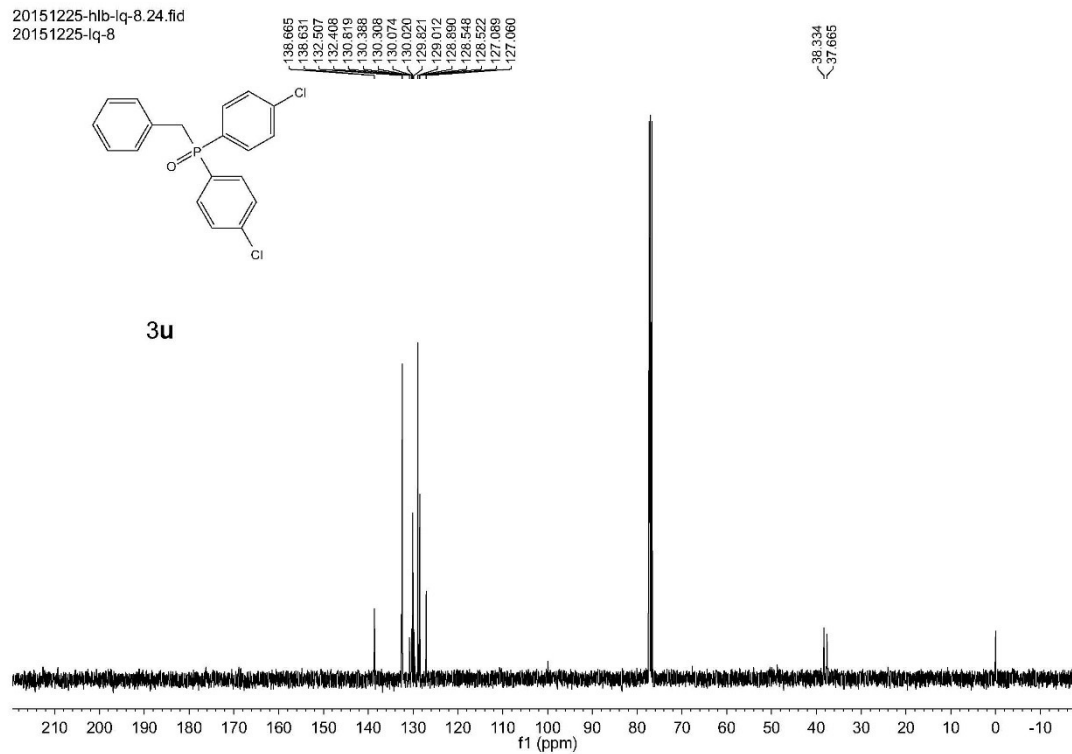

<sup>31</sup>P NMR

20151225-hlb-lq-7.24.fid  
20151225-lq-7

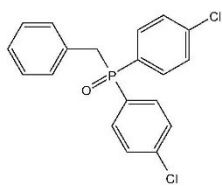

**3u**

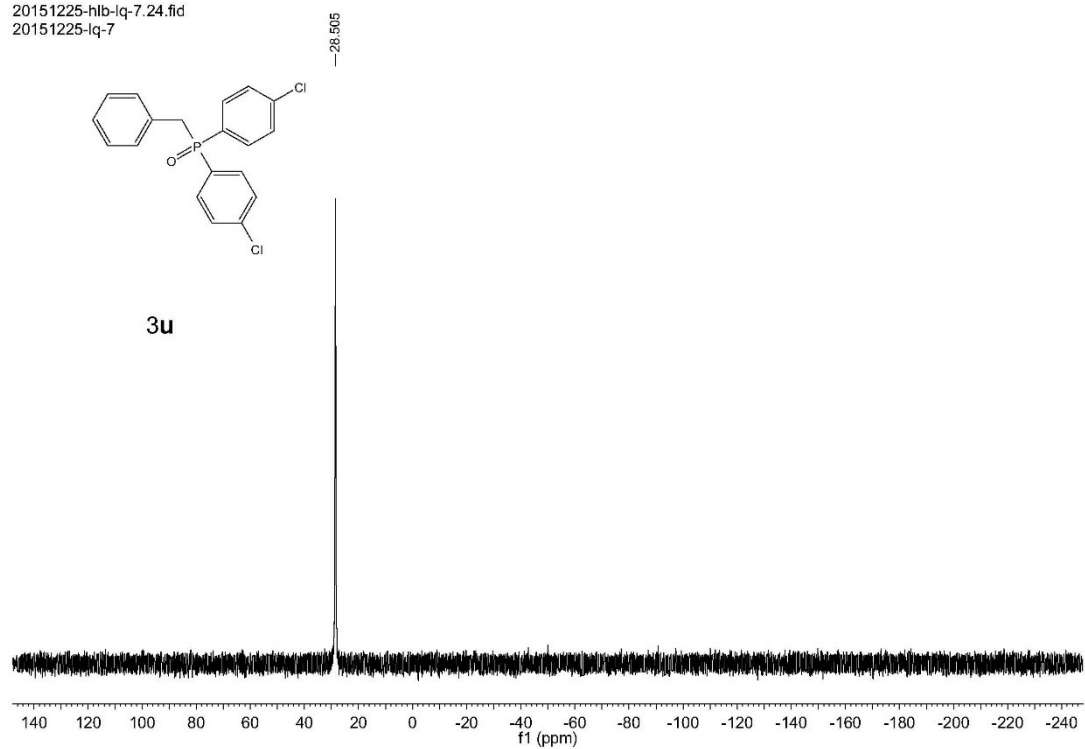

Supplement: d2ra02812c1.pdf [file d2ra02812c1.pdf]
